## 1 Early post-zygotic mutations contribute to congenital heart disease

2  
3 Alexander Hsieh<sup>1,\*</sup>, Sarah U. Morton<sup>2,3,\*</sup>, Jon A.L. Willcox<sup>3,\*</sup>, Joshua M. Gorham<sup>3</sup>, Angela C. Tai<sup>3</sup>, Hongjian  
4 Qi<sup>1</sup>, Steven DePalma<sup>3</sup>, David McKean<sup>3</sup>, Emily Griffin<sup>1</sup>, Kathryn B. Manheimer<sup>4</sup>, Daniel Bernstein<sup>5</sup>, Richard  
5 W. Kim<sup>6</sup>, Jane W. Newburger<sup>2</sup>, George A. Porter Jr.<sup>7</sup>, Deepak Srivastava<sup>8</sup>, Martin Tristani-Firouzi<sup>9</sup>,  
6 Martina Brueckner<sup>10</sup>, Richard P. Lifton<sup>14</sup>, Elizabeth Goldmuntz<sup>13</sup>, Bruce D. Gelb<sup>4</sup>, Wendy K. Chung<sup>1,#</sup>,  
7 Christine E. Seidman<sup>3,11,12#</sup>, J. G. Seidman<sup>3,#</sup>, Yufeng Shen<sup>1,#^</sup>

8  
9 <sup>1</sup> Columbia University Medical Center, New York, NY, USA

10 <sup>2</sup> Boston Children's Hospital, Boston, Massachusetts, USA.

11 <sup>3</sup> Harvard Medical School, Boston, Massachusetts, USA.

12 <sup>4</sup> Icahn School of Medicine at Mount Sinai, New York, New York, USA

13 <sup>5</sup> Stanford University, Palo Alto, California, USA.

14 <sup>6</sup> Children's Hospital Los Angeles, Los Angeles, California, USA.

15 <sup>7</sup> University of Rochester Medical Center, Rochester, New York, USA.

16 <sup>8</sup> Gladstone Institutes and University of California San Francisco, San Francisco, California, USA.

17 <sup>9</sup> University of Utah School of Medicine, Salt Lake City, Utah, USA.

18 <sup>10</sup> Yale University School of Medicine, New Haven, Connecticut, USA.

19 <sup>11</sup> Brigham and Women's Hospital, Boston, Massachusetts, USA

20 <sup>12</sup> Howard Hughes Medical Institute, Harvard University, Boston, Massachusetts, USA

21 <sup>13</sup> Children's Hospital of Philadelphia, Philadelphia, Pennsylvania, USA

22 <sup>14</sup> Rockefeller University, New York, NY, USA

23  
24 \*,# Equal contribution.

25 ^Corresponding author. Email: [ys2411@cumc.columbia.edu](mailto:ys2411@cumc.columbia.edu) (Y.S.).

26  
27  
28 [alh2194@cumc.columbia.edu](mailto:alh2194@cumc.columbia.edu) (A.H.)

29 [Sarah.Morton@childrens.harvard.edu](mailto:Sarah.Morton@childrens.harvard.edu) (S.U.M.)

30 [Jon\\_Willcox@hms.harvard.edu](mailto:Jon_Willcox@hms.harvard.edu) (J.A.L.W.)

31 [jgorham@genetics.med.harvard.edu](mailto:jgorham@genetics.med.harvard.edu) (J.M.G.)

32 [angela\\_tai@hms.harvard.edu](mailto:angela_tai@hms.harvard.edu) (A.C.T.)

33 [hq2130@columbia.edu](mailto:hq2130@columbia.edu) (H.Q.)

34 [depalma@genetics.med.harvard.edu](mailto:depalma@genetics.med.harvard.edu) (S.D.)

35 [dmckean@genetics.med.harvard.edu](mailto:dmckean@genetics.med.harvard.edu) (D.M.)

36 [eg2871@cumc.columbia.edu](mailto:eg2871@cumc.columbia.edu) (E.G.)

37 [kathryn.manheimer@icahn.mssm.edu](mailto:kathryn.manheimer@icahn.mssm.edu) (K.B.M.)

38 [danb@stanford.edu](mailto:danb@stanford.edu) (D.B.)

39 [rikim@chla.usc.edu](mailto:rikim@chla.usc.edu) (R.W.K.)

40 [jane.newburger@cardio.chboston.org](mailto:jane.newburger@cardio.chboston.org) (J.W.N.)

41 [george\\_porter@urmc.rochester.edu](mailto:george_porter@urmc.rochester.edu) (G.A.P.)

42 [deepak.srivastava@gladstone.ucsf.edu](mailto:deepak.srivastava@gladstone.ucsf.edu) (D.S.)

43 [martin.tristani@utah.edu](mailto:martin.tristani@utah.edu) (M.T.F.)

44 [martina.brueckner@yale.edu](mailto:martina.brueckner@yale.edu) (M.B.)

45 [rickl@mail.rockefeller.edu](mailto:rickl@mail.rockefeller.edu) (R.P.L.)

46 [Goldmuntz@email.chop.edu](mailto:Goldmuntz@email.chop.edu) (E.G.)

47 [bruce.gelb@mssm.edu](mailto:bruce.gelb@mssm.edu) (B.D.G.)

48 [wkc15@cumc.columbia.edu](mailto:wkc15@cumc.columbia.edu) (W.K.C.)

49 [cseidman@genetics.med.harvard.edu](mailto:cseidman@genetics.med.harvard.edu) (C.E.S.)

50 [seidman@genetics.med.harvard.edu](mailto:seidman@genetics.med.harvard.edu) (J.G.S.)

51 [ys2411@cumc.columbia.edu](mailto:ys2411@cumc.columbia.edu) (Y.S.)

52

53 **Abstract**

54 *Background*

55 The contribution of somatic mosaicism, or genetic mutations arising after oocyte fertilization, to congenital  
56 heart disease (CHD) is not well understood. Further, the relationship between mosaicism in blood and  
57 cardiovascular tissue has not been determined.

58

59 *Results*

60 We developed a computational method, Expectation-Maximization-based detection of Mosaicism (EM-  
61 mosaic), to analyze mosaicism in exome sequences of 2530 CHD proband-parent trios. EM-mosaic  
62 detected 326 mosaic mutations in blood and/or cardiac tissue DNA. Of the 309 detected in blood DNA,  
63 85/97 (88%) tested were independently confirmed, while 7/17 (41%) candidates of 17 detected in cardiac  
64 tissue were confirmed. MosaicHunter detected an additional 64 mosaics, of which 23/46 (50%) among 58  
65 candidates from blood and 4/6 (67%) of 6 candidates from cardiac tissue confirmed. Twenty-five mosaic  
66 variants altered CHD-risk genes, affecting 1% of our cohort. Of these 25, 22/22 candidates tested were  
67 confirmed. Variants predicted as damaging had higher variant allele fraction than benign variants,  
68 suggesting a role in CHD. The frequency of mosaic variants above 10% mosaicism was 0.13/person in  
69 blood and 0.14/person in cardiac tissue. Analysis of 66 individuals with matched cardiac tissue available  
70 revealed both tissue-specific and shared mosaicism, with shared mosaics generally having higher allele  
71 fraction.

72

73 *Conclusions*

74 We estimate that ~1% of CHD probands have a mosaic variant detectable in blood that could contribute  
75 to cardiac malformations, particularly those damaging variants expressed at higher allele fraction  
76 compared to benign variants. Although blood is a readily-available DNA source, cardiac tissues analyzed  
77 contributed ~5% of somatic mosaic variants identified, indicating the value of tissue mosaicism analyses.

78

79 *Keywords*

80 Mosaic, Somatic, Congenital Heart Disease, Exome Sequencing

## 81 **Background**

82 Mosaicism results from somatic mutations that arise post-zygotically in an early embryonic cell,  
83 resulting in two or more cell populations with distinct genotypes in the developing embryo {Biesecker  
84 2013}. The developmental status of the early embryonic cell at the time of mutagenesis determines the  
85 proportion of variant-carrying cells and the tissue distribution of these cells in the post-natal child {Acuna-  
86 Hidalgo 2015}. While germline variants have a variant allele frequency (VAF) of 0.5, somatic mosaic  
87 variants have a significantly lower VAF.

88 Post-zygotic mosaic mutations have been implicated in several diseases including non-malignant  
89 developmental disorders such as overgrowth syndromes {Poduri 2013; Lindhurst 2012; Kurek 2016},  
90 structural brain malformations {Poduri 2012; Januar 2014; Riviere 2012; Lee 2012}, epilepsy {Stosser  
91 2018}, and autism spectrum disorder {Lim 2017; Krupp 2017; Freed 2016; Dou 2017}. Recent analyses  
92 also identified mosaic variants in a cohort of patients with congenital heart disease (CHD) {Manheimer  
93 2018}, but the prevalence of these was far less than germline variants (CHD) {Zaidi 2013; Homsy 2015;  
94 Jin 2017; Zaidi 2017}.

95 Assessment of the frequency of mosaicism in human disease is confounded by technical issues,  
96 including differences in sequencing depth, DNA sources, and variant assessment pipelines. Low levels of  
97 mosaicism can escape the detection threshold of traditional sequencing methods with standard read  
98 depths, while post-zygotic mutations with a higher percentage of affected cells are difficult to discriminate  
99 from germline *de novo* mutations {Acuna-Hidalgo 2015}. All of these issues can lead to substantially  
100 different conclusions. For example, analyses of mosaicism in autism spectrum disorder was recently  
101 assessed from whole exome sequence (WES) data from whole blood DNA from 2506 families (proband,  
102 parents and unaffected sibling; trios and quads) in the Simons Simplex Collection (SSC) {Fischbach  
103 2010}. The primary sequence data were analyzed by three groups; one that identified a protein-coding  
104 somatic mosaic variant rate of 0.074 per individual {Freed 2016}, another that found a mosaic rate of  
105 0.059 per individual {Lim 2017}, and a third group that reported a mosaic rate of 0.125 per individual  
106 {Krupp 2017}. This disparity suggests the need for more systematic mosaic mutation detection methods  
107 that account for dataset-specific confounding factors.

108 By contrast, analyses of affected tissues can improve the sensitivity and specificity of detection of  
109 somatic mosaicism. In cancer, methods to detect these events, such as MuTect {Cibulskis 2013},  
110 compare tumor and benign tissues from the same patient. Mosaicism has also been demonstrated from  
111 the analyses of unpaired samples with cancer and other pathologies {Sun 2018; Huang 2017; Smith  
112 2015} by the demonstration of variants in affected tissues that are absent from blood-derived DNA  
113 {Symoens 2017; McDonald 2018}. With access to cardiac tissues from patients with CHD obtained during  
114 surgical repair, we hypothesized that analyses of mosaicism in cardiac tissue might improve insights into  
115 the causes of this common congenital anomaly. As many cardiomyocyte lineages share a mesodermic  
116 origin with blood cells but exit the cell cycle during embryogenesis, we also sought to determine if  
117 mosaicism in the heart exhibited distinct patterns of mosaicism with regard to variant frequency and allele  
118 fractions.

119 In this study, we developed a computational method, EM-mosaic (Expectation-Maximization-  
120 based detection of Mosaicism), to detect mosaic single nucleotide variants (SNVs) using WES of proband  
121 and parent DNA. To optimize this method, we measured mosaic detection power as a function of  
122 sequencing depth. We compared EM-mosaic and MosaicHunter {Huang 2014} to investigate mosaicism  
123 in 2530 CHD proband-parent trios from the Pediatric Cardiac Genomics Consortium (PCGC) {Jin et al  
124 2017}, using exome sequences derived from blood-derived DNA. We detected predicted deleterious  
125 mosaic mutations in genes involved in known biological processes relevant to CHD or developmental  
126 disorders in 1% of probands. The accuracy of these mosaic variant detection algorithms was assessed  
127 using an independent re-sequencing method. We found that among high-confidence mosaic mutations in  
128 CHD-relevant genes, likely-damaging variants tended to have higher VAF than likely-benign variants.

129 In parallel we assessed mosaicism by EM-mosaic and MosaicHunter in 70 discarded tissues from  
130 several heart regions obtained from 66 probands who underwent cardiac surgical repairs. While VAF  
131 varied significantly (>3 fold) between blood and cardiovascular tissue at about 60% of sites, in general  
132 mosaic variants with high (>15%) VAF were more likely shared between blood and cardiac tissue than  
133 variants with lower VAF.

134

135 **Results**

136 *High-accuracy detection of mosaic mutations in WES data using EM-mosaic*

137 We analyzed whole exome sequence (WES) data from 2530 CHD proband-parent trios {Homsy  
138 2015; Jin 2017} (**Table S1**). Among this cohort, 1205 probands had CHD with neurodevelopmental  
139 disorders (NDD) and/or extracardiac manifestations (EM), 788 had isolated CHD at the time of  
140 enrollment, 539 had undetermined NDD status due to young neonatal age at the time of enrollment, and  
141 9 subjects had incomplete data (**Table S2**).

142 Previous WES analyses {Jin et al 2017} identified 1742 germline *de novo* SNVs among 838  
143 cases with NDD and/or EM, 516 isolated cases, 644 cases of unknown NDD status, and 7 with  
144 incomplete data. These *de novo* variants were identified using the Genome Analysis Toolkit (GATK)  
145 pipeline {McKenna 2010; DePristo 2011} assuming a germline diploid model in which the expected VAF  
146 is 0.5. This model has limited sensitivity to detect mosaic mutations for which the fraction of alternative  
147 allele reads is significantly below 0.5, especially because *de novo* variants with VAF<0.2 were excluded  
148 to reduce false discovery.

149 To efficiently capture mosaic variants with VAF<0.4, we developed a new method (EM-mosaic) to  
150 detect mosaic variants in WES sequence of a proband and parents (trios). Potential mosaic variants were  
151 identified in WES sequence data using SAMtools *mpileup* {Li 2009} with settings designed to capture  
152 sites with VAF between 0.1-0.4 and merged with the variants found by the GATK pipeline {Jin et al 2017}  
153 (**Fig S1**) to create a union variant set. To reduce the elevated false positive rate inherent in low-VAF calls,  
154 we applied a set of empirical filters to remove likely technical artifacts due to sequencing errors  
155 associated with repetitive and/or low complexity sequences. We then manually inspected *de novo* SNVs  
156 with VAF<0.3 (n=582) using IGV and filtered out an additional 188 likely false positives. After  
157 preprocessing and outlier removal, the remaining 2971 *de novo* SNVs were used as input to our mosaic  
158 detection model.

159 Among the 2971 *de novo* SNVs, this pipeline identified 309 sites as candidate mosaics based on  
160 posterior odds score (**Fig 1A-B, Table S3**), including 50 sites that were previously reported as germline  
161 *de novo* variants {Jin et al 2017}. An additional 86 sites were identified as having posterior odds below  
162 our threshold of 10 but greater than 1 (**Fig S2A, S2B**), including a *ZEB2* variant with posterior odds 4.7  
163 that was previously confirmed via ddPCR {Manheimer 2018}. Among these 86 variants, 53 are likely

164 mosaic and 33 are likely germline (**Fig S2B**). We chose not to include these sites since there was  
 165 insufficient evidence to confidently resolve them individually as mosaic or germline.

166

167 *Mosaic mutations found in blood derived DNA with MosaicHunter*

168 We also employed MosaicHunter, which uses a Bayesian genotyping algorithm with a series of  
 169 stringent filters (see Supplemental Methods) for discovering mosaic variants using WGS genotype  
 170 information from trios. {Huang 2017} Among the 2530 CHD trios, MosaicHunter identified an initial set of  
 171 58976 sites showing evidence of mosaicism, including 214 high-confidence variants located in coding  
 172 regions. (**Fig S3**). After applying a minimum likelihood ratio (LR) cutoff of 80 for distinguishing mosaic  
 173 from germline mutation, and additional heuristic filters (**Supplemental Methods**), MosaicHunter identified  
 174 116 coding sites (**Table S4**) or 0.05 mosaics /individual.

175 Of the mosaic candidates detected by MosaicHunter, 58/116 (50%) were also identified by EM-  
 176 mosaic while 58/116 (50%) candidates were unique to MosaicHunter (**Table 1; Fig S4**). Of the 58  
 177 candidates unique to MosaicHunter, 35 were filtered out by EM-mosaic on the basis of insufficient  
 178 alternate allele read support, 16 had a non-zero allelic depth in the parents, and 7 failed quality filters.  
 179 The 251 candidates unique to EM-mosaic were discarded by the MosaicHunter pipeline during BAM  
 180 reprocessing (n=13), quality filtering (n=146), application of LR cutoff (22), or were not called due to  
 181 inadequate read depth (n=70) (**Fig S3**).

182

**Table 1: Mosaic variant detection by EM-Mosaic, MosaicHunter and validated by PCR product sequencing**

|                                       |              | Union            | Shared         | Unique           |                |
|---------------------------------------|--------------|------------------|----------------|------------------|----------------|
|                                       |              |                  |                | EM-Mosaic        | MosaicHunter   |
| <b>Mosaic Variants (total)*</b>       |              | <b>315 (332)</b> | <b>56 (57)</b> | <b>218 (240)</b> | <b>29 (35)</b> |
| <b>Mosaic Candidates</b>              |              | 367              | 58             | 251              | 58             |
| <b>Mosaic Candidate VAF mean (SD)</b> |              | 0.13 (0.06)      | 0.12 (0.05)    | 0.13 (0.06)      | 0.10 (0.05)    |
| <b>MiSeq Confirmation</b>             | Total Tested | 143              | 22             | 75               | 46             |
|                                       | Mosaic       | 108              | 21             | 64               | 23             |
|                                       | Germline     | 3                | 0              | 3                | 0              |
|                                       | No Variant   | 32               | 1              | 8                | 23             |
| <b>Validation Rate</b>                |              | 76%              | 95%            | 85%              | 50%            |

183 \*Estimated number of mosaic variants found among 2530 CHD probands (total number of mosaic variants detected  
 184 by EM-mosaic and MosaicHunter).

185

186

187 *Sequence confirmation of candidate mosaic variants and estimation of mosaicism in CHD*

188 From the 367 high-confidence EM-mosaic and/or MosaicHunter SNVs, we selected 143  
189 candidates (97 identified by EM-mosaic; 68 identified by MosaicHunter) for experimental confirmation  
190 using MiSeq amplicon resequencing (**Table S5; Table S11 and S12; Methods**). DNA fragments  
191 encompassing the putative mosaic variant were PCR-amplified from proband and each parent DNA,  
192 sequenced on an Illumina MiSeq next generation sequencer and VAF was calculated for each individual.  
193 These candidate mosaics included SNVs on the extremes of the VAF spectrum, as well as mosaics that  
194 were flagged by MosaicHunter quality filters. Candidate mosaic variants were considered confirmed by  
195 MiSeq analyses if they demonstrated an amplicon VAF exceeding 0.01 but less than 0.45, so as to  
196 indicate a variant of post-zygotic origin. MiSeq VAF values closely correlated with those originally  
197 determined by exome sequencing ( $P= 2.2 \times 10^{-16}$ ; **Fig S5**).

198 We confirmed 85/97 (88%) EM-mosaic candidate mosaic variants. Three candidate variants were  
199 likely germline *de novo* SNVs (VAF>0.45). Nine candidate variants were 'false positives' that were neither  
200 germline *de novo* SNVs or mosaic SNVs since either no variant reads were detected by MiSeq  
201 sequencing of the proband amplicon, or the same small fraction of variants were detected in proband  
202 amplicon and one parent's amplicon.

203 Parallel analyses with MosaicHunter confirmed 44/68 (65%) candidate mosaic variants. There  
204 were 23 sites for which no variant reads were detected by MiSeq amplicon sequencing (MiSeq  
205 VAF<0.001) or in which the same small fraction of variant reads was detected in the proband amplicon as  
206 in one parent's amplicon.

207 We considered whether estimates of mosaic variant frequency were sensitive to whole exome  
208 sequencing depth by calibrating estimates of mosaic detection power using properties of the sequence  
209 data (average read depth, prior mosaic fraction, and the value of our overdispersion parameter  $\theta$ ) (**Fig**  
210 **S6; Supplemental Methods**). Our projected mosaic detection power curves demonstrated more than a  
211 doubling of power to detect mosaic variants with VAF 0.2 as sequencing depth increases from 40x to 80x



212 **(Fig 1C)**. Projected mosaic detection power curves for less stringent mosaic cutoffs showed similar  
213 increases of power with increasing sequencing depth **(Fig S8)**.

214 To estimate the ‘true’ frequency of mosaicism per blood DNA exome, independent of average  
215 coverage detection power constraints, we estimated the ‘true’ mosaic count in a VAF range by multiplying  
216 the number of mosaics by the inverse of the detection power for each VAF bin. Applying this method to  
217 the 184 of 309 high-confidence EM-mosaic variants with VAF>0.1, we estimated the adjusted number of  
218 mosaics with VAF>0.1 to be 361 **(Fig S8A)**. Thus, the true frequency of coding mosaics in the blood  
219 ( $0.4 > \text{VAF} > 0.1$ ) is 0.14 variants per individual, representing a non-negligible class of mutations with  
220 potential contribution to genetic risk for congenital heart disease. The estimated true mosaic frequency  
221 does not change significantly when using less stringent mosaic definitions **(Figure S8)**. In sum, we  
222 identified 315 blood mosaic variants in 2530 CHD probands or 0.13 mosaic variants per subject with a  
223 mean VAF of  $0.13 \pm 0.06$ . We do not anticipate that doubling the sequencing depth would change  
224 significantly this estimate.

225

226 *Mosaic variants occurred most frequently at CpG sequences.*

227 Previous studies demonstrated a strong preference for *de novo* C>T mutations at CpG  
228 dinucleotides compared to other dinucleotides due to the spontaneous deamination of 5-methylcytosine  
229 {Fryxell 2005; Francioli 2015}. We asked whether the germline *de novo* variants observed in CHD  
230 probands and the 332 mosaic sites demonstrated a similar sequence preference **(Fig 1, Table 1, S3, S4)**.  
231 Of the 2662 germline *de novo* mutations identified in 2530 CHD probands, 979 variants (37% of all  
232 variants) involved mutation of the cytosine of a CpG dinucleotide **(Fig 2A)**. By contrast, 99 (29% of all  
233 mosaic SNVs) of 332 mosaic SNVs altered the cytosine of a CpG dinucleotide; significantly more than  
234 expected by chance (2.2x above expectation;  $p=2 \times 10^{-15}$ ). These observations suggest that somatic *de*  
235 *nov* mutations were 1.4-fold less likely to involve a CpG dinucleotide than germline *de novo* mutations in  
236 CHD probands ( $P=0.01$ ; **Fig 2B**). Even ignoring the high CpG mutation frequency, cytosines and  
237 guanines were ~2-fold more likely to be mutated than adenines or thymidines both for germline mutations  
238 and for mosaic variants. Surprisingly, somatic mutations of A>C/T>G transversions in ApC dinucleotides  
239 were ~2-fold greater than the corresponding germline mutations ( $P=5 \times 10^{-8}$ ; **Fig 2B**).



240

241 *Detection of mosaic mutations in CHD tissues*

242 Using EM-mosaic and MosaicHunter we analyzed exome sequences from 70 cardiac tissues  
243 derived from 66 subjects with CHD (**Table S6**) and paired blood samples. Among 57 *de novo* variants  
244 (allele depth approximately 0.5) that were previously identified in blood-derived DNA, 54 were also found  
245 in CHD tissues. Of the 3 *de novo* variants not present in cardiac tissue, 1 was outside of the tissue WES  
246 capture region and 2 occurred in a single proband (Table 2). In addition, 23 distinct candidate mosaic  
247 variants were detected by EM-mosaic (n=13), MosaicHunter (n=6), or by both algorithms (n= 4). All 23  
248 candidates were tested via MiSeq amplicon sequencing of blood and cardiac tissue DNAs; 15 of 23  
249 unique candidate mosaics were confirmed (**Table 2, S7**), including a *CCNC* variant that was identified in  
250 two different CHD tissues from proband 1-01684. Ten (86%) confirmed mosaic variants were detected in  
251 blood and cardiac tissues (MAF>0.01), four were found only in cardiac tissue, and one was found only in  
252 blood. Of the 7 mosaics detected by blood WES analysis, 4 were confirmed in the corresponding cardiac  
253 tissue sample. Remarkably, five confirmed cardiac tissue mosaic variants occurred in one proband (1-  
254 07004), one of which was also present in blood DNA.

255 These analyses indicate a frequency of coding mosaics ( $0.4 > \text{VAF} > 0.1$ ) in the cardiac tissues of  
256 0.14 per individual (9 of 66 probands), which approximated our estimate of 0.14 blood mosaics per  
257 individual (**Fig S8A**). Despite these similar frequencies, multiple distinct mosaic variants were identified in  
258 these tissues. Mosaics with highest VAF were more likely to be found in both tissues (Mann-Whitney U  
259 Test  $P=0.019$ ), presumably indicating that the mutation occurred earlier in lineage development (**Fig S9**).

260

261

262 **Table 2. Mosaics detected in individuals with matched cardiovascular tissue and blood**

263 **< Insert Table 2; see end of document >**

264 Characteristics of mosaic variants predicted for individuals with blood and cardiovascular tissue WES data available.  
265 Among 15 mosaics, 5 were detected via analysis of blood WES, 8 were detected from cardiovascular tissue WES,  
266 and 2 were detected by both approaches. Six of 7 (86%) mosaics detected from analysis of blood were present in  
267 both DNA sources with MiSeq  $\text{VAF} \geq 0.01$ . Two additional variants previously identified as *de novo* germline variants in  
268 blood WES were absent from CHD tissue WES. Minimum 1023 MiSeq reads used to determine VAF. Abbreviations:  
269 AD, allelic depth (reference, alternate); AO, aorta; AtrSpt, atrial septum; Bmis, benign missense; Dmis, deleterious  
270 missense; LOF, Loss of function variant; LV, left ventricle; RV, right ventricle; VAF, variant allele fraction.

271

272

273 *Blood and Cardiac Tissue Mosaics Likely to Contribute to CHD*

274 Our prior genetic studies of CHD studies showed that damaging *de novo* variants typically  
275 occurred in genes highly expressed in the top quartile of the developing E9.5 mouse heart (HHE).{Zaidi  
276 2013; Homsy 2015} or contributed to CHD in mouse models {Jin 2017}. Among the 342 mosaic variants  
277 identified from blood or cardiac tissue analyses that were not false by MiSeq, 65 altered these HHE  
278 and/or mouse CHD genes (n=4558, **Table S8**). RefSeq functional annotation predicted 52 variants as  
279 likely-damaging variants (LOF, Dmis), and 46 as likely benign, missense (**Table S8, S9**). In total, we  
280 observed potentially CHD-causing mosaic mutations in 25 participants, representing 1% of the 2530 total  
281 participants in our CHD cohort. Among these 25 mosaics, we confirmed 22/22 (100%) candidates tested  
282 via MiSeq. Notably, multiple likely-damaging mosaic variants altered genes (*ISL1*, *SETD2*, *NOVA2*,  
283 *SMAD9*, *LZTR1*, *KCTD10*, *KCTD20*, *FZD5*, and *QKI*) involved in key developmental pathways, which  
284 may account for the extra-cardiac phenotypes observed in these patients (**Table 3, S10**). There was no  
285 difference in the proportion of individuals with extracardiac features among those with damaging mosaic  
286 variants compared to the overall cohort (11/25 vs 909/ 2521,  $P=0.68$ ), and there was a wide range of  
287 CHD subtypes. Five subjects carried additional *de novo* LoF or Dmis variants (1-06216, *TYRP1*; 1-  
288 04046, *KRT13*; 1-06677, *TRIP4*; 1-05011, *KDM5B*; 1-00018, *SBF1*) and 4 genes harbored *de novo* LoF  
289 or Dmis variants other than those listed in Table 3 (*FBN1*; *PKD1*; *LZTR1*; *PIK3C2G*). No CNVs were  
290 detected in these subjects, with the exception of 1-00192 (duplication at chr15:22062306-23062355; non-  
291 overlapping with the *GLYR1* mosaic).

292 If mosaic variants were unrelated to CHD, we would expect similar allelic fractions between  
293 mosaics with variants predicted as likely damaging or likely benign. However, we found that the allele  
294 fraction of likely damaging variants was significantly higher (Mann-Whitney U Test  $P=0.001$ , **Fig 4A**).  
295 Moreover, among mosaic variants in genes that are not included among HHE or mouse CHD genes, we  
296 found no significant difference of allele fraction ( $P=0.985$ , **Fig 4B**). We repeated these analyses using  
297 less stringent posterior odds cutoffs of 2 and 5 and found the same result (**Fig S10**). Together these data  
298 support our conclusion that at least some likely-damaging mosaic variants identified here contribute to  
299 CHD. These results were determined independently of MiSeq validation results.

300  
301  
302

### Table 3. Damaging Mosaics in CHD-relevant genes

303 < Insert Table 3; see end of document>

304 There were 25 potentially-pathogenic mosaic mutations based on known gene function and patient phenotype. Some  
305 of these probands have previously described rare LoF/Dmis variants, though none are likely pathogenic for CHD {Jin  
306 2017}. Additionally, some genes were previously found to have LoF/Dmis variants among other individuals in this  
307 CHD cohort. Abbreviations: ASD, atrial septal defect; BAV, bicuspid aortic valve; Dmis, deleterious missense;  
308 episcore, haploinsufficiency score (percentile rank) {Han 2018}; Heart Exp, heart expression percentile rank; LoF,  
309 loss-of-function; pLI, probability of loss-of-function intolerance {gnomAD}; PCGC, Pediatric Cardiac Genomics  
310 Consortium; VAF, variant allele fraction; VSD, ventricular septal defect. \*VAF refers to CHD tissue WES.

311  
312  
313

## 314 Discussion

315 Distinguishing mosaic mutations from constitutional mutations has both clinical management and  
316 reproductive implications for proband and parents. Individuals with mosaic mutations are generally  
317 clinically less severely affected for conditions that affect multiple parts of the body {Happle 1986; Wallis  
318 1990; Cohn 1990; Etheridge 2011; Donkervoort 2015; Weinstein 2016}. Mutations that occur post-  
319 zygotically should have no recurrence risk for the parents and could have a recurrence risk of less than  
320 50% for the proband depending on gonadal involvement. This study is among the first investigations of  
321 the role of post-zygotic mosaic mutations in CHD. We developed a new computational method to robustly  
322 detect mosaic single nucleotide variants from blood WES data at standard read depth. Applying this  
323 method to a cohort of 2530 CHD patients, we detected 309 high-confidence mosaics (with a confirmation  
324 frequency of 88% in a subset of variants assessed) or 0.12 variants per proband. Sequencing of cardiac  
325 tissue to greater depth identified an additional 8 mosaic variants that had not been detected in blood  
326 WES, 6 of which are present in cardiac tissue but not blood. We found significantly more variants per  
327 proband in cardiac tissue DNA (0.23 variants per proband) than in blood DNA (0.12 variants per proband;  
328  $p=0.02$ ). While the increased numbers of mosaic variants in cardiac tissue DNA vs blood DNA may reflect  
329 technical differences such as sequencing read depth of cardiac tissue DNA vs blood DNA, it is possible  
330 that somatic variation occurs more frequently in cardiac tissue of CHD probands than in their blood.  
331 Whether or not there are more cardiac tissue mosaic variants in CHD probands than blood DNA variants,  
332 we found 10 mosaic variants among 66 CHD proband cardiac tissues with a higher VAF in tissue than in  
333 blood (**Table 2**) and 5 variants among these individuals with a higher VAF in blood than in tissue.

334 In total, we observed potentially CHD-causing mosaic mutations in 25 participants, representing  
335 1% of the 2530 total participants in our CHD cohort. Among these 25 mosaics, we confirmed 22/22  
336 (100%) candidates tested. We found that in CHD-related genes, likely-damaging mosaic mutations have

337 significantly greater alternative allele fraction than likely-benign mosaics, suggesting that some of these  
338 variants contribute to CHD. Comparison of blood and cardiovascular tissues demonstrated tissue-specific  
339 mosaic variants, though those variants with a higher VAF were more likely to be shared between tissues.  
340 Due to limitations of conventional clinical interpretation for both mosaic and constitutional CHD variants  
341 **(Supplemental Methods)**, we cannot know with complete certainty which among these 25 variants is  
342 pathogenic and instead propose that, among our detected mosaics, the 23 detected from blood WES  
343 data provide an estimate of the disease-causing mosaics detectable in blood with standard exome-  
344 sequencing read depth. Nine of these variants affect genes known to have a role in cardiac development:  
345 *ISL1*, *SETD2*, *NOVA2*, *QKI*, *SMAD9*, *LZTR1*, *KCTD10*, *KCTD20*, and *FZD5*.

346 The mosaic LOF mutation in *ISL1* is likely to be the cause of CHD in participant 1-05095. *ISL1* is  
347 a transcription factor essential to normal cardiac development that regulates expression of *NKX*, *GATA*,  
348 and *TBX* family genes {Golzio 2012; Colombo 2018} and controls secondary heart field differentiation and  
349 atrial septation {Colombo 2018; Briggs 2012}. *ISL1* deficiency has been shown to lead to severe CHD in  
350 mice {Cai 2003; Golzio 2012}. Participant 1-05095 has an isolated atrial septal defect consistent with a  
351 secondary heart field defect phenotype {Stevens 2010} and has no other previously reported damaging  
352 germline variants in CHD-related genes.

353 Damaging germline *de novo* variants in CHD subjects are enriched in genes related to chromatin  
354 modification and RNA processing {Homsy 2015; Jin 2017}. Three genes with damaging mosaic variants  
355 discovered here have related functions. *SETD2* is a histone methyltransferase required for embryonic  
356 vascular remodeling {Hu 2010}; it is both sensitive to haploinsufficiency and highly expressed in the heart  
357 during development. *NOVA2* is a key alternative-splicing regulator involved in angiogenesis that has been  
358 shown to disrupt vascular lumen formation when depleted {Giampietro 2015}. *QKI* encodes an RNA-  
359 binding protein that regulates splicing, RNA export from the nucleus, protein translation, and RNA stability  
360 {Lauriat 2008}. *QKI* is also highly expressed in the heart during development and has been shown to  
361 cause CHD and other blood vessel defects in mice when dysregulated {Noveroske 2002}.

362 Other damaging mosaic variants affect processes known to be relevant to CHD. *SMAD9* is  
363 involved in the TGF-beta signaling pathway. TGF-beta signaling plays a critical role in cardiac  
364 development and cardiovascular physiology, leading to pulmonary arterial hypertension and cardiac

365 abnormalities in mice when dysregulated {Drake 2015; Soubrier 2013}. *LZTR1* encodes a member of the  
366 BTB-Kelch superfamily that is highly expressed in the heart during development and has been associated  
367 with Noonan {Yamamoto 2015; Ghedira 2017} and DiGeorge Syndromes {Kurahashi 1995}, both of which  
368 are characterized by CHD. *KCTD10* binds to and represses the transcriptional activity of *TBX5* (T-box  
369 transcription factor), which plays a dose-dependent role in the formation of cardiac chambers {Tong  
370 2014}. *KCTD10* is highly expressed in the heart during development and has been shown to produce  
371 CHD in mice when dysregulated {Ren 2014}. *KCTD20* is a positive regulator of Akt {Nawa 2013} also  
372 highly expressed in the heart during development. *FZD5* is haploinsufficient and encodes a  
373 transmembrane receptor involved in Wnt, mTOR, and Hippo signaling pathways and has been shown to  
374 play a role in cardiac development {Dawson 2013}.

375 Finally, two mosaic variants found in cardiac tissue, genes encoding *RFX3* and *PIK3C2G*, may be  
376 disease-relevant. *PIK3C2G* is a signaling kinase involved in cell proliferation, survival, and migration, as  
377 well as oncogenic transformation and protein trafficking {OMIM: 609001; RefSeq}. The effects of  
378 *PIK3C2G* haploinsufficiency during cardiac development has not been characterized. *RFX3* is a highly-  
379 constrained ciliogenic transcription factor that leads to pronounced laterality defects {Rasmdell 2005 } and  
380 disruption of *RFX3* leads to congenital heart malformations in mice {Lo 2011 MGI: 5560494}. Notably the  
381 *RFX3* LoF variant has a 4-fold higher VAF in cardiac tissue than in blood.

382 Several investigators, who studied cancer and diseases with cutaneous manifestations, proposed  
383 that the VAF correlates with time of mutation acquisition and disease burden {Belickova 2016; Sallman  
384 2016; Happle 1986}. In this study, we used VAF as a proxy for cellular percentage and mutational timing,  
385 with increasing VAF corresponding to events occurring earlier in development. Thus, we assume that  
386 CHD-causal mosaic events identified in blood-derived DNA occurred during or shortly after the  
387 gastrulation process (3<sup>rd</sup> week of development) {Moorman 2003} in the mesodermal progenitor cells that  
388 differentiate into both heart precursor cells (cardiogenic mesoderm) and blood precursor cells  
389 (hemangioblasts). We found that in CHD-relevant genes, mosaic sites predicted to be damaging tended  
390 to have higher VAF than sites predicted to be likely benign, consistent with the hypothesis that these  
391 mutations arose early in fetal development and play significant roles in CHD. However, additional  
392 functional studies are necessary to fully assess causality. .

393 Finally, we recognize that while our method is able to detect a large fraction of mosaic variants in  
394 blood, our calibrated estimates for the true number of mosaics suggest there are a non-negligible number  
395 of additional mutations that were not identified by our method. At our current average sequencing depth  
396 of 60x, we have limited sensitivity in the low VAF (<0.05) range. To reliably identify these low allelic  
397 fraction sites, ultra-deep sequencing will be critical to distinguishing true variants from noise. At 500x, we  
398 estimate detection sensitivity for mosaic events at VAF 0.05 to be above 80%. We also recognize age-  
399 related clonal hematopoiesis {Jaiswal 2014; Genovese 2014} as a potential confounding factor in somatic  
400 mutation detection; however, our study cohort includes mostly pediatric cases and we did not observe  
401 mosaic mutations in genes related to clonal expansion (e.g. *ASXL1*, *DNMT3A*, *TET2*, *JAK2*) nor did we  
402 observe a relationship between proband age and mosaic rate (**Fig S11, S12**), suggesting minimal impact  
403 from this process.

404

## 405 **Conclusions**

406 This study is among the first investigations of the role of post-zygotic mosaic mutations in CHD.  
407 Despite limitations in sequencing depth and sample type, EM-mosaic was able to detect 309 high-  
408 confidence mosaics with resequencing confirmation in 88% of cases assessed. Using MosaicHunter, an  
409 additional 64 candidate mosaic sites were identified, of which 23/46 (50%) candidates from blood DNA  
410 and 4/6 (67%) from CHD tissue DNA validated. In total, we observed potentially CHD-causing mosaic  
411 mutations in 25 participants, representing 1% of our CHD cohort, and propose that these 25 cases  
412 provide an estimate of the disease-causing mosaics detectable in blood with standard exome-sequencing  
413 read depth. Additionally, we found that in CHD-related genes, likely-damaging mosaics have significantly  
414 greater alternative allele fraction than likely benign mosaics, suggesting that many of these variants  
415 cause CHD and occurred early in development. In the subset of our cohort for which cardiovascular  
416 tissue samples were available, we show that mosaics detected in blood can also be found in the disease-  
417 relevant tissue and that, while the VAF for mosaic variants often differed between blood and  
418 cardiovascular tissue DNA, variants with higher VAF were more likely to be shared between tissues.  
419 Given current limitations in sequencing depth and on the availability of relevant tissues, particularly for  
420 conditions impacting internal organs like the heart, the full extent of the role of mosaicism in many



421 diseases remains to be explored. However, as datasets containing larger numbers of blood and other  
422 tissue samples sequenced at higher depths become increasingly available, we will be able to more fully  
423 characterize the biological processes underlying post-zygotic mutation and, by extension, the contribution  
424 of mosaicism to disease using the methods presented here.

425

## 426 **Methods**

### 427 *Samples and Sequencing Data*

428 We analyzed WES data from 2530 Congenital Heart Disease (CHD) proband-parents trio families  
429 who were recruited as part of the Pediatric Cardiac Genomics Consortium (PCGC) study {Homsy 2015;  
430 Jin 2017}. Genomic DNA from venous blood or saliva was captured using Nimblegen v.2 exome capture  
431 reagent (Roche) or Nimblegen SeqCap EZ MedExome Target Enrichment Kit (Roche) followed by  
432 Illumina DNA sequencing (paired-end, 2x75bp) {Jin 2017, Zaidi 2013}. Genomic DNA from 70 surgically-  
433 discarded cardiovascular tissue samples (2-10mg) was isolated using DNeasy Blood & Tissue Kit  
434 (QIAGEN), then captured using xGen Exome Research Panel v1.0 reagent (IDT) followed by Illumina DNA  
435 sequencing (paired-end, 2x75bp). Sequence reads were mapped to the hg19 human reference genome  
436 with BWA-MEM and BAM files were further processed following GATK Best Practices, which included  
437 duplication marking, indel realignment, and base quality recalibration steps. Blood and saliva samples  
438 had sample average depth 60x and cardiovascular tissue samples had sample average depth 160x.

439

### 440 *De Novo Variant Calling and Annotation*

441 We processed our sample BAMs and called variants on a per-trio basis using SAMtools (v1.3.1-  
442 42) and BCFtools (v1.3.1-174). Pileups were generated using samtools '*mpileup*' command with mapQ  
443 20 and baseQ 13 to minimize the effect of poorly mapped reads on variant allele fraction, followed by  
444 bcfutils '*call*' using a cutoff of 1.1 for the posterior probability of the homozygous reference genotype  
445 parameter (-p) to capture additional sites with variant allele fraction suggestive of post-zygotic origin that  
446 would otherwise be excluded under the default threshold of 0.01. To identify *de novo* mutations from trio  
447 VCF files, we selected sites with (i) a minimum of 6 reads supporting the alternate allele in the proband  
448 and (ii) for both parents, a minimum depth of 10 reads and 0 alternate allele read support. Variants were



449 then annotated using ANNOVAR (v2017-07-17) to include information from refGene, gnomAD (March  
450 2017), 1000 Genomes (August 2015), ExAC, genomicSuperDups, CADD (v1.3) COSMIC (v70), and  
451 dbSNP (v147) databases, as well as pathogenicity predictions from a variety of established methods  
452 included as part of the dbNSFP (v3.0a) database or generated in-house (MCAP, REVEL, MVP, MPC).  
453 We used REVEL {Ionnisidis 2016} to evaluate missense variant functional consequence, using the  
454 recommended threshold of 0.5 corresponding to sensitivity of 0.754 and specificity of 0.891. We used  
455 spliceAI {Jaganathan 2019} to predict the variant functional impact on splicing using the delta score  
456 thresholds of 0.2 for likely pathogenic (high recall), 0.5 for pathogenic (recommended), and 0.8 for  
457 pathogenic (high precision). We considered sites predicted to be Likely Gene-Disrupting (LOF) (stopgain,  
458 stoploss, frameshift indels, splice-site), Deleterious Missense (Dmis; nonsynonymous SNV with  
459 REVEL>0.5), or splice-damaging (Benign Missense or synonymous SNV with delta score > 0.5) to be  
460 damaging and likely disease causing. We considered sites predicted to be Synonymous (delta score ≤  
461 0.5) or Benign missense (Bmis; nonsynonymous SNV with REVEL ≤ 0.5 and delta score ≤ 0.5) to be non-  
462 damaging.

463

#### 464 *Pre-processing and QC*

465 To reduce the number of low VAF technical artifacts introduced by our variant calling approach,  
466 we pre-processed our variants using a variety of filters. We first excluded indels from further analysis, as  
467 their downstream model parameter estimates were less stable than those of SNVs. We then filtered our  
468 variant call set for rare heterozygous coding mutations (Minor Allele Frequency (MAF) ≤ 10<sup>-4</sup> across all  
469 populations represented in gnomAD and ExAC databases). To account for regions in the reference  
470 genome that are likely to affect read-depth estimates, we removed variant sites found in regions of non-  
471 unique mappability (score<1; 300bp), likely segmental duplication (score>0.95), and known low-  
472 complexity {Li 2014}. We then excluded sites located in MUC and HLA genes and imposed a maximum  
473 variant read depth threshold of 500. We used SAMtools PV4 to exclude sites with evidence of technical  
474 issues using a cutoff of 1e-3 for baseQ Bias and Tail Distance Bias and a cutoff of 1e-6 for mapQ Bias.  
475 To account for potential strand bias, we used an in-house script to flag sites that have either (1) 0  
476 alternate allele read support on either the forward or reverse strand or (2) p<1e-3 and (Odds Ratio

477 (OR)<0.33 or OR>3) when applying a two-sided Fisher's Exact Test to compare proportions of reference  
478 and alternate allele read counts on the forward and reverse strands. We also excluded sites with cohort  
479 frequency>1%, as well as sites belonging to outlier samples (with abnormally high *de novo* SNV (dnSNV)  
480 counts, cutoff = 8) and variant clusters (defined as sites with neighboring SNVs within 10bp). Finally, we  
481 applied an FDR-based minimum  $N_{alt}$  filtering step (**Fig S7**) to control for false positives caused purely by  
482 sequencing errors.

483

#### 484 *IGV Visualization of Low Allele Fraction de novo SNVs*

485 To reduce the impact of technical artifacts on model parameter estimation, we manually  
486 inspected *de novo* SNVs with VAF<0.3 (n=558) using Integrative Genomics Viewer (v2.3.97) to visualize  
487 the local read pileup at each variant across all members of a given trio family. We focused on the allele  
488 fraction range 0.0-0.3 since this range is enriched for technical artifacts that could potentially impact  
489 downstream parameter estimation. Sites were filtered out if (1) there are inconsistent mismatches in the  
490 reads supporting the mosaic allele, (2) the site overlaps or is adjacent to an indel, (3) the site has low  
491 MAPQ or is not Primary alignment, (4) there is evidence of technical bias (strand, read position, tail  
492 distance), or (5) the site is mainly supported by soft-clipped reads.

493

#### 494 *Expectation-Maximization to Estimate Prior Mosaic Fraction and Control FDR*

495 Current estimates for the fraction of *de novo* events occurring post-zygotically are unstable due to  
496 differences in study factors such as variant calling methods, average sequencing depth, and paternal  
497 ages. In order to use this fraction as a prior probability in our posterior odds and false discovery  
498 calculations, we reason that this value must be estimated from the data itself. We used an expectation-  
499 maximization algorithm to jointly estimate the fraction of mosaics among apparent *de novo* mutations and  
500 to calculate a per-site likelihood ratio score. This initial mosaic fraction estimate gives us a prior  
501 probability of mosaicism, independent of sequencing depth or variant caller, and allows us to calculate for  
502 each variant the posterior odds that a given site is mosaic rather than germline. To control for false  
503 discovery among our predicted mosaic candidates, we chose a posterior odds threshold of 10 to restrict  
504 FDR to 9.1%.

505

### 506 *Mosaic Mutation Detection Model*

507 To distinguish variant sites that show evidence of mosaicism from germline heterozygous sites,  
508 we modeled the number of reads supporting the variant allele ( $N_{alt}$ ) as a function of the total site depth  
509 ( $N$ ). In the typical case,  $N_{alt}$  follows a binomial model with parameters  $N$  = site depth and  $p$  = mean VAF.  
510 However, we observed notable overdispersion in the distribution of variant allele fraction compared to the  
511 expectations under this binomial model (**Fig S6**). To account for this overdispersion, we instead modeled  
512  $N_{alt}$  using a beta-binomial distribution {Heinrich 2012; Ramu 2013}. We estimated an overdispersion  
513 parameter  $\theta$  for our model as follows: for site depth values  $N$  in the range 1 to 500, we (1) bin variants by  
514 identifying all sites with depth  $N$ , (2) calculate a maximum-likelihood estimate  $\theta$  value using  $N$  and all  $N_{alt}$   
515 values for variants in a given bin, and (3) estimate a global  $\theta$  value by taking the average of  $\theta$  values  
516 across all bins, weighted by the number of variants in each bin. We then used  $\theta$  in our expectation-  
517 maximization approach to jointly estimate prior mosaic fraction and to calculate per-site likelihood ratios.

518 To calculate the posterior odds that a given variant arose post-zygotically, we first calculated a  
519 likelihood ratio (LR) of two models:  $M_0$ : germline heterozygous variant, and  $M_1$ : mosaic variant. Under our  
520 null model  $M_0$ , we calculated the probability of observing  $N_{alt}$  from a beta-binomial distribution with site  
521 depth  $N$ , observed mean germline VAF  $p$ , and overdispersion parameter  $\theta$ . Under our alternate model  $M_1$ ,  
522 we calculated the probability of observing  $N_{alt}$  from a beta-binomial distribution with site depth  $N$ ,  
523 observed site VAF  $p=N_{alt}/N$ , and overdispersion parameter  $\theta$ . Finally, for each variant, we calculated LR  
524 by using the ratio of probabilities under each model and posterior odds by multiplying LR by our E-M  
525 estimated prior mosaic fraction estimate. We defined mosaic sites as those with posterior odds greater  
526 than 10 (corresponding to 9.1% FDR). We used posterior odds in this context to be able to control for  
527 false discovery, but we output similarly valid p-value and likelihood ratio scores for each *de novo* SNV.

528

### 529 *Mutation Confirmation by MiSeq Amplicon Sequencing*

530 Chromosome coordinates were expanded 500 bp upstream and downstream of the candidate  
531 mosaic variants in the UCSC Genome Browser. Primer 3 Plus software was used to design forward and  
532 reverse primers to generate 150-300 bp amplicons containing the candidate site. PCR reactions

533 consisting of genomic DNA, primers, and Phusion polymerase were amplified by thermal cycling and  
534 purified with AMPure XP beads. The purified PCR product was quantified, and 0.5-1.0 ng of product was  
535 used to construct Nextera XT libraries according to the protocol published by Illumina. Libraries were  
536 purified using AMPure XP beads, and final libraries were quantified and pooled to undergo sequencing  
537 through Illumina MiSeq.

538 We experimentally tested for the presence our predicted post-zygotic sites in the original blood  
539 DNA and cardiovascular tissue DNA samples using Illumina MiSeq Amplicon sequencing. The Amplicon  
540 Deep Sequencing workflow, optimized for the detection of somatic mutations in tumor samples, offers  
541 ultra-high sequencing depth (>1000x) that gives us the resolution to confirm low VAF variants, accurately  
542 estimate site VAF, and to distinguish true variant calls from technical artifacts. Mosaic candidates were  
543 considered validated if the variant allele matched the MiSeq call and both the mosaic VAF and MiSeq  
544 VAF indicated post-zygotic origin (VAF<0.45).

545 Mosaic candidates were selected for confirmation on the basis of VAF, plausible involvement in  
546 CHD (based on predicted pathogenicity and HHE status), and detection method (**Table S11**; **Table S12**).  
547 We sampled mosaics from both ends of the VAF spectrum to evaluate our ability to distinguish high VAF  
548 mosaics (VAF>0.2; n=29) from germline variants and to distinguish low VAF mosaics (VAF<=0.1; n=52)  
549 from technical artifacts. Confirmation rate across different VAF bins is shown in **Figure S13**. We also  
550 selected for confirmation mosaics detected uniquely by either EM-mosaic or MosaicHunter, for the sake  
551 of method comparison (**Table 1**).

552 To examine a potential source of bias in our candidate selection process, we compared the  
553 posterior odds distribution of selected candidate mosaics (n=97) against those not chosen (n=212). We  
554 found that our tested candidates had lower posterior odds than untested mosaics (mean<sub>tested</sub>=5.382,  
555 mean<sub>untested</sub>=7.050, log<sub>10</sub>-scale; Mann Whitney  $U$   $P=0.002$ ) (**Fig 14**), suggesting that our validation rate is  
556 not buoyed by testing variants with the strongest evidence of mosaicism. For method development  
557 purposes, we intentionally focused on mosaics with lower posterior odds as these fall in the VAF range  
558 for which it is most difficult to distinguish germline from mosaic.

559

560 *Investigating the relationship between VAF and pathogenicity*

561 We hypothesized that mosaic contribution to disease is positively correlated with cellular  
562 percentage and by extension mutational timing. Here, we used variant allele fraction as a proxy for  
563 cellular percentage. We grouped mosaics into likely-damaging and likely-benign and compared the  
564 distribution of allele fraction in CHD-related genes. We defined likely-damaging variants as: (a) likely  
565 gene-disrupting (LOF) variants (including premature stop-gain, frameshifting, and variants located in  
566 canonical splice sites), (b) missense variants predicted to be damaging by REVEL {Ioannidis 2016} (with  
567 score  $\geq 0.5$ ) or (c) missense variants and synonymous predicted to be splice-damaging by spliceAI (with  
568 score  $> 0.5$ ). One of the main findings from previous CHD studies is that damaging *de novo* variants in  
569 genes highly expressed in the developing heart (“HHE”, ranked in the top 25% by cardiac expression data  
570 in mouse at E14.5 {Zaidi 2013; Homsy 2015}) contribute to non-isolated CHD cases that have additional  
571 congenital anomalies or neurodevelopmental disorders. Therefore, we considered the union of HHE  
572 genes and known candidate CHD genes {Jin 2017} as CHD-related genes (n=4558). For mosaics in  
573 CHD-related genes and for mosaics in other genes, we used a Mann-Whitney *U* Test to compare the VAF  
574 distributions of likely-damaging and likely-benign groups.

575

#### 576 *Estimated contribution of mosaicism to CHD*

577 We identified likely disease-causing mosaic mutations on the basis of predicted pathogenicity and  
578 presence in genes involved in biological processes relevant to CHD or developmental disorders. Each  
579 mosaic mutation was annotated with gene-specific information, including heart expression percentile,  
580 probability of loss-of-function intolerance (pLI) score {Lek 2016}, whether dysregulation causes CHD in  
581 mice {Smith 2018; Finger 2017}, and gene function {NCBI RefSeq}. We focused on HHE genes, genes  
582 with high pLI (pLI>0.9), genes that cause CHD phenotypes in mice, and genes involved in key  
583 developmental processes such as Wnt, mTOR, and TGF-beta signaling pathways. Then, for each patient,  
584 we used the clinical phenotype to further prioritize mosaic mutations most likely contributing to that  
585 individual's clinical features. Detailed mutation annotation and clinical phenotypes for the mosaic carriers  
586 described above can be found in **Table S10**. We estimate the contribution of mosaicism to CHD as the  
587 percentage of individuals carrying likely disease-causing mosaic mutations among all individuals in our  
588 CHD cohort.

589

590

591

592 **Abbreviations**

593 ASD: Autism Spectrum Disorder

594 CHD: Congenital Heart Disease

595 dnSNV: *de novo* SNV

596 Dmis: Deleterious Missense mutation

597 DP<sub>site</sub>: Total Read Depth at a variant site

598 DP<sub>sample</sub>: Sample-wide Average Read Depth

599 ExAC: Exome Aggregation Consortium

600 FDR: False Discovery Rate

601 gnomAD: Genome Aggregation Database

602 HHE: High Heart Expression

603 LOF: Loss-of-Function

604 LR: Likelihood Ratio

605 MAF: Minor Allele Fraction

606 N: Total Read Depth

607 N<sub>alt</sub>: Alternate Allele Read Depth

608 OR: Odds Ratio

609 PCGC: Pediatric Cardiac Genomics Consortium

610 pLI: Probability of Loss-of-Function Intolerance

611 PV4: P-value for strand bias, baseQ bias, mapQ bias and tail distance bias (SAMtools)

612 SNV: Single Nucleotide Variant

613 VAF: Variant Allele Fraction

614 WES: Whole Exome Sequencing

615

616

617

618

## References

619

Acuna-Hidalgo, R., Bo, T., Kwint, M. P., van de Vorst, M., Pinelli, M., Veltman, J. A., ... Gilissen, C.

620

(2015). Post-zygotic Point Mutations Are an Underrecognized Source of De Novo Genomic

621

Variation. *The American Journal of Human Genetics*, 97(1), 67–74.

622

<http://doi.org/10.1016/J.AJHG.2015.05.008>

623

Belickova, M., Vesela, J., Jonasova, A., Pejsova, B., Votavova, H., Merkerova, M. D., ... Cermak, J.

624

(2016). TP53 mutation variant allele frequency is a potential predictor for clinical outcome of

625

patients with lower-risk myelodysplastic syndromes. *Oncotarget*, 7(24), 36266–36279.

626

<http://doi.org/10.18632/oncotarget.9200>

627

Biesecker, L. G., & Spinner, N. B. (2013). A genomic view of mosaicism and human disease. *Nature*

628

*Reviews Genetics*, 14(5), 307–320. <http://doi.org/10.1038/nrg3424>

629

Briggs, L. E., Kakarla, J., & Wessels, A. (2012). The pathogenesis of atrial and atrioventricular

630

septal defects with special emphasis on the role of the dorsal mesenchymal protrusion.

631

*Differentiation*, 84(1), 117–130. <http://doi.org/10.1016/j.diff.2012.05.006>

632

Cai, C.-L., Liang, X., Shi, Y., Chu, P.-H., Pfaff, S. L., Chen, J., & Evans, S. (2003). Isl1 identifies a

633

cardiac progenitor population that proliferates prior to differentiation and contributes a majority

634

of cells to the heart. *Developmental Cell*, 5(6), 877–89. Retrieved from

635

<http://www.ncbi.nlm.nih.gov/pubmed/14667410>

636

Cibulskis, K., Lawrence, M. S., Carter, S. L., Sivachenko, A., Jaffe, D., Sougnez, C., ... Getz, G.

637

(2013). Sensitive detection of somatic point mutations in impure and heterogeneous cancer

638

samples. *Nature Biotechnology*, 31(3), 213–219. <http://doi.org/10.1038/nbt.2514>

639

Cohn, D. H., Starman, B. J., Blumberg, B., & Byers, P. H. (1990). Recurrence of lethal osteogenesis

640

imperfecta due to parental mosaicism for a dominant mutation in a human type I collagen gene

641

(COL1A1). *American Journal of Human Genetics*, 46(3), 591–601. Retrieved from

642

<http://www.ncbi.nlm.nih.gov/pubmed/2309707>

643

Colombo, S., de Sena-Tomás, C., George, V., Werdich, A. A., Kapur, S., MacRae, C. A., & Targoff,

644

K. L. (2017). *nkx* genes establish SHF cardiomyocyte progenitors at the arterial pole and



- 645 pattern the venous pole through Isl1 repression. *Development*, dev.161497.  
646 <http://doi.org/10.1242/dev.161497>
- 647 Dawson, K., Aflaki, M., & Nattel, S. (2013). Role of the Wnt-Frizzled system in cardiac  
648 pathophysiology: A rapidly developing, poorly understood area with enormous potential.  
649 *Journal of Physiology*, 591(6), 1409–1432. <http://doi.org/10.1113/jphysiol.2012.235382>
- 650 DePristo, M. A., Banks, E., Poplin, R., Garimella, K. V, Maguire, J. R., Hartl, C., ... Daly, M. J.  
651 (2011). A framework for variation discovery and genotyping using next-generation DNA  
652 sequencing data. *Nature Genetics*, 43(5), 491–8. <http://doi.org/10.1038/ng.806>
- 653 Donkervoort, S., Hu, Y., Stojkovic, T., Voermans, N. C., Foley, A. R., Leach, M. E., ... Bönnemann,  
654 C. G. (2015). Mosaicism for Dominant Collagen 6 Mutations as a Cause for Intrafamilial  
655 Phenotypic Variability. *Human Mutation*, 36(1), 48–56. <http://doi.org/10.1002/humu.22691>
- 656 Dou, Y., Yang, X., Li, Z., Wang, S., Zhang, Z., Ye, A. Y., ... Wei, L. (2017). Postzygotic single-  
657 nucleotide mosaicisms contribute to the etiology of autism spectrum disorder and autistic traits  
658 and the origin of mutations. *Human Mutation*, 38(8), 1002–1013.  
659 <http://doi.org/10.1002/humu.23255>
- 660 Drake, K. M., Comhair, S. A., Erzurum, S. C., Tuder, R. M., & Aldred, M. A. (2015). Endothelial  
661 Chromosome 13 Deletion in Congenital Heart Disease–associated Pulmonary Arterial  
662 Hypertension Dysregulates SMAD9 Signaling. *American Journal of Respiratory and Critical  
663 Care Medicine*, 191(7), 850–854.
- 664 Etheridge, S. P., Bowles, N. E., Arrington, C. B., Pilcher, T., Rope, A., Wilde, A. A. M., ... Tristani-  
665 Firouzi, M. (2011). Somatic mosaicism contributes to phenotypic variation in Timothy  
666 syndrome. *American Journal of Medical Genetics Part A*, 155(10), 2578–2583.  
667 <http://doi.org/10.1002/ajmg.a.34223>
- 668 Finger, J. H., Smith, C. M., Hayamizu, T. F., McCright, I. J., Xu, J., Law, M., ... Ringwald, M. (2017).  
669 The mouse Gene Expression Database (GXD): 2017 update. *Nucleic Acids Research*, 45(D1),  
670 D730–D736. <http://doi.org/10.1093/nar/gkw1073>

- 671 Fischbach, G. D., & Lord, C. (2010). The Simons Simplex Collection: A Resource for Identification of  
672 Autism Genetic Risk Factors. *Neuron*, *68*(2), 192–195.  
673 <http://doi.org/10.1016/j.neuron.2010.10.006>
- 674 Francioli, L. C., Polak, P. P., Koren, A., Menelaou, A., Chun, S., Renkens, I., ... Sunyaev, S. R.  
675 (2015). Genome-wide patterns and properties of de novo mutations in humans. *Nature*  
676 *Genetics*, *47*(7), 822–826. <https://doi.org/10.1038/ng.3292>
- 677 Freed, D., & Pevsner, J. (2016). The Contribution of Mosaic Variants to Autism Spectrum Disorder.  
678 *PLOS Genetics*, *12*(9), e1006245. <http://doi.org/10.1371/journal.pgen.1006245>
- 679 Fryxell, K. J., & Moon, W.-J. (2005). CpG Mutation Rates in the Human Genome Are Highly  
680 Dependent on Local GC Content. *Molecular Biology and Evolution*, *22*(3), 650–658.  
681 <https://doi.org/10.1093/molbev/msi043>
- 682 Genovese, G., Kähler, A. K., Handsaker, R. E., Lindberg, J., Rose, S. A., Bakhoum, S. F., ...  
683 McCarroll, S. A. (2014). Clonal Hematopoiesis and Blood-Cancer Risk Inferred from Blood  
684 DNA Sequence. *New England Journal of Medicine*, *371*(26), 2477–2487.  
685 <http://doi.org/10.1056/NEJMoa1409405>
- 686 Ghedira, N., Kraoua, L., Lagarde, A., Abdelaziz, R. Ben, Olschwang, S., Desvignes, J. P., ... Mrad,  
687 R. (2017). Further Evidence for the Implication of LZTR1, a Gene not Associated with the Ras-  
688 Mapk Pathway, in the Pathogenesis of Noonan Syndrome. *Biology and Medicine*, *09*(06), 4–7.  
689 <http://doi.org/10.4172/0974-8369.1000414>
- 690 Giampietro, C., Deflorian, G., Gallo, S., Di Matteo, A., Pradella, D., Bonomi, S., ... Ghigna, C.  
691 (2015). The alternative splicing factor Nova2 regulates vascular development and lumen  
692 formation. *Nature Communications*, *6*, 1–15. <http://doi.org/10.1038/ncomms9479>
- 693 Golzio, C., Havis, E., Daubas, P., Nuel, G., Babarit, C., Munnich, A., ... Etchevers, H. C. (2012).  
694 ISL1 Directly Regulates FGF10 Transcription during Human Cardiac Outflow Formation. *PLoS*  
695 *ONE*, *7*(1), e30677. <http://doi.org/10.1371/journal.pone.0030677>
- 696 Happle, R. (1986). The McCune-Albright syndrome: a lethal gene surviving by mosaicism. *Clinical*  
697 *Genetics*, *29*(4), 321–4. Retrieved from <http://www.ncbi.nlm.nih.gov/pubmed/3720010>

- 698 Happle, R. (1993). Mosaicism in human skin. Understanding the patterns and mechanisms.  
699 *Archives of Dermatology*, 129(11), 1460–70. Retrieved from  
700 <http://www.ncbi.nlm.nih.gov/pubmed/8239703>
- 701 Heinrich, V., Stange, J., Dickhaus, T., Imkeller, P., Krüger, U., Bauer, S., ... Krawitz, P. M. (2012).  
702 The allele distribution in next-generation sequencing data sets is accurately described as the  
703 result of a stochastic branching process. *Nucleic Acids Research*, 40(6), 2426–2431.  
704 <http://doi.org/10.1093/nar/gkr1073>
- 705 Homsy, J., Zaidi, S., Shen, Y., Ware, J. S., Samocha, K. E., Karczewski, K. J., ... Chung, W. K.  
706 (2015). De novo mutations in congenital heart disease with neurodevelopmental and other  
707 congenital anomalies. *Science*, 350(6265), 1262–1266. <http://doi.org/10.1126/science.aac9396>
- 708 Hu, M., Sun, X.-J., Zhang, Y.-L., Kuang, Y., Hu, C.-Q., Wu, W.-L., ... Chen, Z. (2010). Histone H3  
709 lysine 36 methyltransferase Hypb/Setd2 is required for embryonic vascular remodeling.  
710 *Proceedings of the National Academy of Sciences*, 107(7), 2956–2961.  
711 <http://doi.org/10.1073/pnas.0915033107>
- 712 Huang, A. Y., Zhang, Z., Ye, A. Y., Dou, Y., Yan, L., Yang, X., ... Wei, L. (2017). MosaicHunter:  
713 accurate detection of postzygotic single-nucleotide mosaicism through next-generation  
714 sequencing of unpaired, trio, and paired samples. *Nucleic Acids Research*, 45(10), e76–e76.  
715 <http://doi.org/10.1093/nar/gkx024>
- 716 Ioannidis, N. M., Rothstein, J. H., Pejaver, V., Middha, S., McDonnell, S. K., Baheti, S., ... Sieh, W.  
717 (2016). REVEL: An Ensemble Method for Predicting the Pathogenicity of Rare Missense  
718 Variants. *The American Journal of Human Genetics*, 99(4), 877–885.  
719 <http://doi.org/10.1016/j.ajhg.2016.08.016>
- 720 Jaiswal, S., Fontanillas, P., Flannick, J., Manning, A., Grauman, P. V., Mar, B. G., ... Ebert, B. L.  
721 (2014). Age-Related Clonal Hematopoiesis Associated with Adverse Outcomes. *New England*  
722 *Journal of Medicine*, 371(26), 2488–2498. <http://doi.org/10.1056/NEJMoa1408617>
- 723 Januar, S. S., Lam, A.-T. N., Kircher, M., D’Gama, A. M., Wang, J., Barry, B. J., ... Walsh, C. A.  
724 (2014). Somatic Mutations in Cerebral Cortical Malformations. *New England Journal of*  
725 *Medicine*, 371(8), 733–743. <http://doi.org/10.1056/NEJMoa1314432>

- 726 Jin, S. C., Homsy, J., Zaidi, S., Lu, Q., Morton, S., DePalma, S. R., ... Brueckner, M. (2017).  
727 Contribution of rare inherited and de novo variants in 2,871 congenital heart disease probands.  
728 *Nature Genetics*, 49(11), 1593–1601. <http://doi.org/10.1038/ng.3970>
- 729 Krupp, D. R., Barnard, R. A., Duffourd, Y., Evans, S. A., Mulqueen, R. M., Bernier, R., ... O'Roak, B.  
730 J. (2017). Exonic Mosaic Mutations Contribute Risk for Autism Spectrum Disorder. *The*  
731 *American Journal of Human Genetics*, 101(3), 369–390.  
732 <http://doi.org/10.1016/j.ajhg.2017.07.016>
- 733 Kurahashi, H., Akagi, K., Inazawa, J., Ohta, T., Niikawa, N., Kayatani, F., ... Nishisho, I. (1995).  
734 Isolation and characterization of a novel gene deleted in DiGeorge syndrome. *Human*  
735 *Molecular Genetics*, 4(4), 541–9. Retrieved from <http://www.ncbi.nlm.nih.gov/pubmed/7633402>
- 736 Kurek, K. C., Luks, V. L., Ayturk, U. M., Alomari, A. I., Fishman, S. J., Spencer, S. A., ... Warman,  
737 M. L. (2012). Somatic Mosaic Activating Mutations in PIK3CA Cause CLOVES Syndrome. *The*  
738 *American Journal of Human Genetics*, 90(6), 1108–1115.  
739 <http://doi.org/10.1016/j.ajhg.2012.05.006>
- 740 Lauriat, T. L., Shiue, L., Haroutunian, V., Verbitsky, M., Ares, M., Ospina, L., & McInnes, L. A.  
741 (2008). Developmental expression profile of quaking, a candidate gene for schizophrenia, and  
742 its target genes in human prefrontal cortex and hippocampus shows regional specificity.  
743 *Journal of Neuroscience Research*, 86(4), 785–796. <http://doi.org/10.1002/jnr.21534>
- 744 Lee, J. H., Huynh, M., Silhavy, J. L., Kim, S., Dixon-Salazar, T., Heiberg, A., ... Gleeson, J. G.  
745 (2012). De novo somatic mutations in components of the PI3K-AKT3-mTOR pathway cause  
746 hemimegalencephaly. *Nature Genetics*, 44(8), 941–945. <http://doi.org/10.1038/ng.2329>
- 747 Lek, M., Karczewski, K. J., Minikel, E. V., Samocha, K. E., Banks, E., Fennell, T., ... Consortium, E.  
748 A. (2016). Analysis of protein-coding genetic variation in 60,706 humans. *Nature*, 536(7616),  
749 285–291. <http://doi.org/10.1038/nature19057>
- 750 Li, H., Handsaker, B., Wysoker, A., Fennell, T., Ruan, J., Homer, N., ... 1000 Genome Project Data  
751 Processing Subgroup. (2009). The Sequence Alignment/Map format and SAMtools.  
752 *Bioinformatics*, 25(16), 2078–2079. <http://doi.org/10.1093/bioinformatics/btp352>

- 753 Lim, E. T., Uddin, M., De Rubeis, S., Chan, Y., Kamumbu, A. S., Zhang, X., ... Walsh, C. A. (2017).  
754 Rates, distribution and implications of postzygotic mosaic mutations in autism spectrum  
755 disorder. *Nature Neuroscience*, *20*(9), 1217–1224. <http://doi.org/10.1038/nn.4598>
- 756 Manheimer, K. B., Richter, F., Edelmann, L. J., D'Souza, S. L., Shi, L., Shen, Y., ... Gelb, B. D.  
757 (2018). Robust identification of mosaic variants in congenital heart disease. *Human Genetics*,  
758 *137*(2), 183–193. <http://doi.org/10.1007/s00439-018-1871-6>
- 759 McKenna, A., Hanna, M., Banks, E., Sivachenko, A., Cibulskis, K., Kernysky, A., ... DePristo, M. A.  
760 (2010). The Genome Analysis Toolkit: a MapReduce framework for analyzing next-generation  
761 DNA sequencing data. *Genome Research*, *20*(9), 1297–303.  
762 <http://doi.org/10.1101/gr.107524.110>
- 763 Moorman, A., Webb, S., Brown, N. A., Lamers, W., & Anderson, R. H. (2003). Development of the  
764 heart: (1) formation of the cardiac chambers and arterial trunks. *Heart (British Cardiac*  
765 *Society)*, *89*(7), 806–14. Retrieved from <http://www.ncbi.nlm.nih.gov/pubmed/12807866>
- 766 Nawa, M., & Matsuoka, M. (2013). KCTD20, a relative of BTBD10, is a positive regulator of Akt.  
767 *BMC Biochemistry*, *14*(1), 27. <http://doi.org/10.1186/1471-2091-14-27>
- 768 Noveroske, J. K., Lai, L., Gaussin, V., Northrop, J. L., Nakamura, H., Hirschi, K. K., & Justice, M. J.  
769 (2002). Quaking is essential for blood vessel development. *Genesis (New York, N.Y. : 2000)*,  
770 *32*(3), 218–30. Retrieved from <http://www.ncbi.nlm.nih.gov/pubmed/11892011>
- 771 Poduri, A., Evrony, G. D., Cai, X., Elhosary, P. C., Beroukhim, R., Lehtinen, M. K., ... Walsh, C. A.  
772 (2012). Somatic Activation of AKT3 Causes Hemispheric Developmental Brain Malformations.  
773 *Neuron*, *74*(1), 41–48. <http://doi.org/10.1016/j.neuron.2012.03.010>
- 774 Ramsdell, A. F. (2005). Left–right asymmetry and congenital cardiac defects: Getting to the heart of  
775 the matter in vertebrate left–right axis determination. *Developmental Biology*, *288*(1), 1–20.  
776 <http://doi.org/10.1016/J.YDBIO.2005.07.038>
- 777 Ramu, A., Noordam, M. J., Schwartz, R. S., Wuster, A., Hurles, M. E., Cartwright, R. A., & Conrad,  
778 D. F. (2013). DeNovoGear: de novo indel and point mutation discovery and phasing. *Nature*  
779 *Methods*, *10*(10), 985–987. <http://doi.org/10.1038/nmeth.2611>

- 780 Ren, K., Yuan, J., Yang, M., Gao, X., Ding, X., Zhou, J., ... Zhang, J. (2014). KCTD10 Is Involved in  
781 the Cardiovascular System and Notch Signaling during Early Embryonic Development. *PLoS*  
782 *ONE*, *9*(11), e112275. <http://doi.org/10.1371/journal.pone.0112275>
- 783 Rivière, J.-B., Mirzaa, G. M., O'Roak, B. J., Beddaoui, M., Alcantara, D., Conway, R. L., ... Dobyns,  
784 W. B. (2012). De novo germline and postzygotic mutations in AKT3, PIK3R2 and PIK3CA  
785 cause a spectrum of related megalencephaly syndromes. *Nature Genetics*, *44*(8), 934–940.  
786 <http://doi.org/10.1038/ng.2331>
- 787 Sallman, D. A., Komrokji, R., Vaupel, C., Cluzeau, T., Geyer, S. M., McGraw, K. L., ... Padron, E.  
788 (2016). Impact of TP53 mutation variant allele frequency on phenotype and outcomes in  
789 myelodysplastic syndromes. *Leukemia*, *30*(3), 666–673. <http://doi.org/10.1038/leu.2015.304>
- 790 Sampson, J., Jacobs, K., Yeager, M., Chanock, S., & Chatterjee, N. (2011). Efficient study design  
791 for next generation sequencing. *Genetic Epidemiology*, *35*(4), n/a-n/a.  
792 <http://doi.org/10.1002/gepi.20575>
- 793 Smith, C. L., Blake, J. A., Kadin, J. A., Richardson, J. E., Bult, C. J., & Mouse Genome Database  
794 Group. (2018). Mouse Genome Database (MGD)-2018: knowledgebase for the laboratory  
795 mouse. *Nucleic Acids Research*, *46*(D1), D836–D842. <http://doi.org/10.1093/nar/gkx1006>
- 796 Smith, K. S., Yadav, V. K., Pei, S., Pollyea, D. A., Jordan, C. T., & De, S. (2016). SomVarIUS:  
797 somatic variant identification from unpaired tissue samples. *Bioinformatics*, *32*(6), 808–813.  
798 <http://doi.org/10.1093/bioinformatics/btv685>
- 799 Soubrier, F., Chung, W. K., Machado, R., Grünig, E., Aldred, M., Geraci, M., ... Humbert, M. (2013).  
800 Genetics and Genomics of Pulmonary Arterial Hypertension. *Journal of the American College*  
801 *of Cardiology*, *62*(25), D13–D21. <http://doi.org/10.1016/J.JACC.2013.10.035>
- 802 Stevens, K. N., Hakonarson, H., Kim, C. E., Doevendans, P. A., Koeleman, B. P. C., Mital, S., ...  
803 Gruber, P. J. (2010). Common Variation in ISL1 Confers Genetic Susceptibility for Human  
804 Congenital Heart Disease. *PLoS ONE*, *5*(5), e10855.  
805 <http://doi.org/10.1371/journal.pone.0010855>
- 806 Stosser, M. B., Lindy, A. S., Butler, E., Retterer, K., Piccirillo-Stosser, C. M., Richard, G., &  
807 McKnight, D. A. (2018). High frequency of mosaic pathogenic variants in genes causing

808 epilepsy-related neurodevelopmental disorders. *Genetics in Medicine*, 20(4), 403–410.  
809 <http://doi.org/10.1038/gim.2017.114>

810 Sun, J. X., He, Y., Sanford, E., Montesion, M., Frampton, G. M., Vignot, S., ... Yelensky, R. (2018).  
811 A computational approach to distinguish somatic vs. germline origin of genomic alterations  
812 from deep sequencing of cancer specimens without a matched normal. *PLOS Computational*  
813 *Biology*, 14(2), e1005965. <http://doi.org/10.1371/journal.pcbi.1005965>

814 Tong, X., Zu, Y., Li, Z., Li, W., Ying, L., Yang, J., ... Zhang, B. (2014). Kctd10 regulates heart  
815 morphogenesis by repressing the transcriptional activity of Tbx5a in zebrafish. *Nature*  
816 *Communications*, 5, 1–10. <http://doi.org/10.1038/ncomms4153>

817 Wallis, G. A., Starman, B. J., Zinn, A. B., & Byers, P. H. (1990). Variable expression of osteogenesis  
818 imperfecta in a nuclear family is explained by somatic mosaicism for a lethal point mutation in  
819 the alpha 1(I) gene (COL1A1) of type I collagen in a parent. *American Journal of Human*  
820 *Genetics*, 46(6), 1034–40. Retrieved from <http://www.ncbi.nlm.nih.gov/pubmed/2339700>

821 Weinstein, M. M., Kang, T., Lachman, R. S., Bamshad, M., Nickerson, D. A., Krakow, D., & Cohn, D.  
822 H. (2016). Somatic mosaicism for a lethal *TRPV4* mutation results in non-lethal metatropic  
823 dysplasia. *American Journal of Medical Genetics Part A*, 170(12), 3298–3302.  
824 <http://doi.org/10.1002/ajmg.a.37942>

825 Yamamoto, G. L., Aguen, M., Gos, M., Hung, C., Pilch, J., Fahiminiya, S., ... Bertola, D. R. (2015).  
826 Rare variants in *SOS2* and *LZTR1* are associated with Noonan syndrome. *Journal of Medical*  
827 *Genetics*, 52(6), 413–421. <http://doi.org/10.1136/jmedgenet-2015-103018>

828 Zaidi, S., & Brueckner, M. (2017). Genetics and Genomics of Congenital Heart Disease. *Circulation*  
829 *Research*, 120(6), 923–940. <http://doi.org/10.1161/CIRCRESAHA.116.309140>

830 Zaidi, S., Choi, M., Wakimoto, H., Ma, L., Jiang, J., Overton, J. D., ... Lifton, R. P. (2013). De novo  
831 mutations in histone-modifying genes in congenital heart disease. *Nature*, 498(7453), 220–  
832 223. <http://doi.org/10.1038/nature12141>

833  
834  
835



836

837 **Fig 1. Mosaic detection by Expectation-Maximization. (A)** Expectation-Maximization (EM) Estimation  
838 to decompose the variant allele fraction (VAF) distribution of our input variants into mosaic and germline  
839 distributions. The EM-estimated prior mosaic fraction was 12.15% and the mean of the mosaic VAF  
840 distribution was 0.15. **(B)** Read depth vs. VAF distribution of individual variants. The blue line denotes  
841 mean VAF (0.49) and the red lines denote the 95% confidence interval under our Beta-Binomial model.  
842 Mosaic variants are defined as sites with posterior odds  $> 10$ , corresponding to a False Discovery Rate of  
843 9.1%. Germline variants are represented in black and mosaic variants are represented in red. **(C)**  
844 Estimated mosaic detection power as a function of average sample depth for values between 40x and  
845 500x.

846

847 **Fig 2. Mutation spectrum of detected germline and mosaic variants.** Rates of specific mutations were  
848 compared in germline **(A)**, blood mosaic **(B)**, and CHD tissue mosaic **(C)** variants. Transitions  
849 predominated in both variant sets.

850

851 **Fig 3. Validated mosaics detected in probands with matched blood and cardiovascular tissue**  
852 **samples available.** Validation VAF from blood compared to validation VAF from cardiovascular tissue  
853 demonstrated tissue-specific mosaicism (red) as well as shared mosaicism (blue). Predicted effect of  
854 mosaic variants corresponds to marker shape.

855

856 **Fig 4. Damaging mosaics in CHD-related genes have higher variant allele fraction than likely-**  
857 **benign mosaics. (A)** Among the 76 mosaics in CHD-related genes, likely damaging variants have a  
858 higher VAF than likely benign (Mann-Whitney  $U$   $p=0.001$ ). **(B)** Among the 233 mosaics in Other (non-  
859 CHD-related) genes, there is no difference in VAF based on predicted effect ( $p=0.985$ ).

860

861

862 **Supplement**

863 **Supplemental Methods**

864 *Union with Validated de novo SNVs from Jin et al. Nature Genetics 2017*

865           As part of the PCGC program, Jin et al. previously sequenced and processed a cohort of 2871  
866 CHD probands – including 2530 parent-offspring trios used in this study – to investigate the contribution  
867 of rare inherited and *de novo* variants to CHD. They called a total of 2992 proband *de novo* variants,  
868 including 2872 SNVs and 118 indels, and Sanger confirmed a subset of the most likely-disease causing  
869 variants. Since we processed the same proband-parent trios using different variant calling pipelines, we  
870 combined the results of our two approaches to provide a more complete input *de novo* call set for mosaic  
871 variant detection.

872           We first processed our SAMtools *de novo* calls using our upstream filters ( $n=2396$  sites passing  
873 all filters). We then applied the same upstream filters to the published dnSNVs from Jin et al. ( $n=2650$   
874 sites passing all filters) before finally taking the union of these two call sets ( $n=3192$ ). There were 1814  
875 sites in the intersection, with 836 sites unique to the Jin et al. calls and 542 sites unique to our SAMtools  
876 calls. After preprocessing, outlier removal, and FDR-based minimum  $N_{\text{alt}}$  filtering, the remaining 2971  
877 dnSNVs were used as input to our mosaic detection model.

878

879 *Mutation Spectrum Analysis*

880           We compared the mutation spectrum – the frequencies of all possible base changes – of our  
881 predicted mosaic candidates against the spectrum of our predicted germline heterozygous variants.  
882 Under the assumption that that post-zygotic events occur randomly (i.e. due to errors in DNA replication  
883 rather than a specific biological process), the mosaic mutation spectrum should not differ significantly  
884 from the germline mutation spectrum. We used Pearson's Chi-square Test to test for a difference in  
885 frequencies across all base changes between our predicted sets of variants. We interpreted large  
886 qualitative differences in base change frequencies as evidence of technical artifacts and rejection of the  
887 Chi-square null as evidence of systemic issues in our pipeline.

888

889 *Mosaic Detection Power Given Sample Average Coverage*

890           To model statistical power in the context of mosaic variant detection, we considered two  
891 conditional probabilities: (i) the probability of detecting a mosaic event (i.e. the probability of a variant's

892 posterior odds exceeding a threshold) given site depth  $DP_{site}$ , VAF, and overdispersion parameter  $\theta$  and  
893 (ii) the probability of observing site depth  $DP_{site}$ , given sample-wide average coverage  $DP_{sample}$ .  
894 (i)  $\Pr(\text{detect mosaic} \mid DP_{site}, \text{VAF}, \theta)$  was calculated by first identifying the VAF range (and by extension,  
895 the range of  $N_{alt}$ ) over which posterior odds  $>$  cutoff, then by integrating the beta-binomial probability  
896 mass function over this range, with considerations for the probability of strand bias ( $P(\text{strand bias} \mid DP_{site})$   
897  $\sim \text{Binomial}(N_{alt}, DP_{site}, p=0.5)$ ).  
898 (ii)  $\Pr(DP_{site} \mid DP_{sample})$  follows an overdispersed poisson distribution that we approximated using a  
899 negative binomial model with overdispersion parameter  $\theta$  {Sampson 2011}. For each  $DP_{sample}$  value, we  
900 calculated a vector of weights corresponding to  $\Pr(DP_{site} \mid DP_{sample})$  for  $DP_{site}$  values in the range (1,  
901 1500).

902 Finally, we took the sum of the detection probabilities described in (i) multiplied by the weights  
903 described in (ii) to determine the probability of detecting a mosaic variant given a sample average  
904 coverage value –  $\Pr(\text{detect mosaic} \mid DP_{sample})$ . Our estimated detection power curves for a range of  
905 sample average coverage values typical of exome-sequencing studies are shown in **(Figure 4A)**. Our  
906 CHD cohort was sequenced to sample average depth of 60x, with prior mosaic fraction=0.121 and  
907 estimated  $\theta=116$ .

908 To estimate the true rate of mosaicism per exome given sample average coverage, we first split  
909 our set of predicted mosaics into VAF bins of size 0.05. For each bin above VAF 0.1, we multiplied the  
910 number of mosaics by the inverse of the detection power for that given VAF bin to estimate the true count  
911 of mosaic variants in that VAF range, assuming full detection power. Since EM-mosaic is underpowered  
912 to detect mosaics with VAF  $<$  0.1 in the blood and since this range is enriched for technical artifacts that  
913 potentially affect our counts, we did not apply this scaling procedure to these bins to avoid over-inflating  
914 our adjusted mosaic rate estimate **(Figure 4B)**.

915

#### 916 *Filtering of MosaicHunter Candidate Variants (Fig S3)*

917 MosaicHunter was used to identify candidate mosaic variants from blood exome-sequencing trio  
918 data using default settings {Huang 2014}. Filtering of original MosaicHunter candidate variants excluded,  
919 in order, any variant present in ExAC (46634), G to T mutations with fewer than  $N_{alt}<10$  oxidative

920 indicating DNA damage {Costello 2013} (3995), non-uniquely called sites (4719), germline SNVs  
921 previously called by GATK HaplotypeCaller (591), probands with >20 mosaic variants (1490 in 10  
922 probands), mosaic log posterior likelihood ratio <10 (940), variants with >2 parental alternative allele  
923 reads (244), variants with gnomAD population frequency > 1e-4 or located in MUC or HLA genes (40).

924

#### 925 *Filtering of cardiovascular tissue Candidate Variants*

926 We used the MosaicHunter pipeline in trio mode to identify candidate variants in WES data from  
927 70 cardiovascular tissue samples (belonging to 66 unique probands). From the list of variants initially  
928 reported by the pipeline using default settings, we applied the same filtration steps listed for  
929 MosaicHunter candidate variants in blood samples with the exception of the removal of G to T mutations  
930 with fewer than 10 alternative allele reads and the mosaic log posterior likelihood ratio <10. Finally, we  
931 removed variants that were identified in either parent or had a total read depth <10 in either parent.

932

#### 933 *Clinical interpretation of mosaic variants – limitations*

934 We note that conventional clinical interpretation of mosaic mutations is challenging for several  
935 reasons: (i) it is unclear in which tissues each mosaic mutation is expressed (ii) several study participants  
936 were very young at time of clinical assessment and many classical disease features may not yet have  
937 developed or been noted, and (iii) the absence of additional clinical features does not necessarily rule out  
938 a mosaic mutation as being for the cause of the CHD. For the purposes of this study, we selected these  
939 mosaic mutations on the basis of predicted pathogenicity and detection in genes involved in biological  
940 processes relevant to CHD or developmental disorders

941

942 **Fig S1. EM-mosaic Flowchart.** We first processed our SAMtools *de novo* calls using our upstream filters  
943 ( $n=2396$  sites passing all filters). We then applied the same upstream filters to the published dnSNVs  
944 from Jin et al. ( $n=2650$  sites passing all filters) before finally taking the union of these two call sets  
945 ( $n=3192$ ). High-confidence mosaics ( $n=309$ ) were defined as mosaics passing IGV inspection and having  
946 posterior odds > 10. Grey text indicates which filters removed candidate mosaic variants called by  
947 MosaicHunter but not by EM-mosaic.

948

949 **Fig S2. Blood variants with posterior odds between 1 and 10.**(A) Distribution of the 86 variants with  
950 posterior odds between 1 and 10.(B) Histogram of counts by bin. To estimate the number of potential  
951 mosaics missed by our threshold, counts of each bin were scaled by the estimated true positive  
952 rate (TPR; posterior odds / 1+posterior odds). By our estimate, 54/86 variants were likely mosaic and  
953 32/86 were likely germline.

954

955 **Fig S3. MosaicHunter workflow.** Quality Control filters excluded any sites that were (1) present in ExAC  
956 (2) G>T with  $N_{\text{alt}} < 10$  (3) parent  $N_{\text{alt}} > 2$ . Outliers were defined as probands carrying more than 20 mosaics,  
957 or non-unique sites. We also removed sites called as germline by GATK Haplotype Caller. High-  
958 confidence mosaics ( $n=116$ ) were defined as having Likelihood Ratio  $> 80$  and affecting coding regions  
959 excluding MUC/HLA genes. Grey text indicates which filters removed variants called by EM-mosaic but  
960 not by MosaicHunter.

961

962 **Fig S4. Comparison of variant allele fraction (VAF) and read depth of EM-mosaic and**  
963 **MosaicHunter.** Candidate mosaic variants detected by the two pipelines had more overlapping variants  
964 at low read depth and VAF values.

965

966 **Fig S5. Targeted sequencing to validate candidate blood mosaic variants.** (A) EM-mosaic and (B)  
967 MosaicHunter variants were assayed using PCR followed by MiSeq for high-depth assessment of  
968 mosaicism. Variants with x symbols were shared by both pipelines. Mosaic variants that validated are  
969 black, while variants with VAF  $> 0.45$  and therefore germline are red.  
970 Validation VAF values demonstrated significant correlation with the original WES-derived VAF for EM-  
971 mosaic (Pearson's correlation  $P=2.2 \times 10^{-16}$ ) and MosaicHunter ( $P=8.2 \times 10^{-11}$ ).

972

973 **Fig S6. Overdispersion.** Overdispersion is commonly seen in WES data {Heinrich 2012; Ramu 2013}  
974 and is defined as observing variance (in terms of the VAF of variants with a given DP value) higher than

975 expected across DP values, under a given statistical model. The blue line denotes the expectation under  
976 a Binomial model and the red line denotes the expectation under a Beta-Binomial model.

977

978 **Fig S7. FDR-based minimum  $N_{alt}$  threshold.** A FDR-based approach was used to determine a threshold  
979 for the minimum number of reads supporting the alternate allele for each site to avoid false positives  
980 caused purely by sequencing errors. Assuming that sequencing errors are independent and that errors  
981 occur with probability 0.005, with the probability of an allele-specific error being  $0.005/3=0.00167$ , and  
982 given the total number of reads ( $N$ ) supporting a variant site, we iterated over a range of possible  $N_{alt}$   
983 values between 1 and  $0.5*N$  and estimated the expected number of false-positives due to sequencing  
984 error, exome-wide  $((1 - f_{poisson}(x=n, \lambda=N*0.005/3))^3 * 3 \times 10^7$ ; where  $f_{poisson}$  is the probability of  $x$  events in a  
985 Poisson process with mean  $\lambda$ ). Assuming one coding *de novo* SNV per exome {Acuna-Hidalgo 2016} and  
986 that roughly 10% of *de novo* SNVs arise post-zygotically {Lim 2017; Krupp 2017; Freed 2016}, we used a  
987 conservative assumption of 0.1 mosaic mutation per exome. To constrain theoretical FDR to 10% we  
988 allowed a maximum of 0.01 false positives per exome and used the corresponding  $N_{alt}$  value to define an  
989 FDR-based minimum  $N_{alt}$  threshold for each variant. We then excluded variants with alternate allele read  
990 counts below this threshold.

991

992 **Fig S8. Estimated mosaic detection power using less stringent mosaic definitions. (A)** Estimated  
993 true frequency of detectable coding mosaics ( $0.4 > VAF > 0.1$ ) adjusted by detection power ( $n=341$ ;  
994  $0.135/\text{exome}$ ) **(B)** Calibrated mosaic detection power and estimated true mosaic frequency of detectable  
995 coding mosaics, using posterior odds cutoff of 5 ( $n=361$ ;  $0.143/\text{exome}$ ). **(C)** Calibrated mosaic detection  
996 power and estimated true mosaic frequency of detectable coding mosaics, using posterior odds cutoff of  
997 2 ( $0.4 > VAF > 0.1$ ;  $n=424$ ;  $0.168/\text{exome}$ ).

998

999 **Fig. S9. Mosaic variants shared in blood and cardiovascular tissues have higher variant allele**  
1000 **fraction.** Validation VAF from **(A)** cardiovascular tissue and **(B)** blood had higher VAF for shared variants  
1001 compared to tissue-specific variants ( $p=0.101$  and  $0.015$ , respectively).

1002

1003 **Fig. S10. Damaging CHD-related mosaics have higher VAF under less stringent definitions of**  
1004 **mosaicism. (A)** Using posterior odds cutoff of 5 (corresponding to 315 mosaics). Among 78 mosaics in  
1005 CHD-related genes (left), there were 14 variants predicted as damaging, 63 variants predicted as likely-  
1006 benign, and 1 variant of unknown functional consequence. Among 237 mosaics in non-CHD-related  
1007 genes (right), there were 41 variants predicted as damaging, 184 variants predicted as likely-benign, and  
1008 2 variants of unknown functional consequence. **(B)** Using posterior odds cutoff of 2 (corresponding to 352  
1009 mosaics). Among 89 mosaics in CHD-related genes (left), there were 17 variants predicted as damaging,  
1010 71 variants predicted as likely-benign, and 1 variant of unknown functional consequence. Among 263  
1011 mosaics in non-CHD-related genes (right), there were 54 variants predicted as damaging, 206 variants  
1012 predicted as likely-benign, and 3 variants of unknown functional consequence.

1013

1014 **Fig. S11. Mosaic rate by age. (A)** Age distribution for all 2530 probands in cohort. **(B)** Mosaic Rate  
1015 across Age ranges. Rate = # mosaics/# probands in age bin. Note: 9/2530 probands missing Age  
1016 information. 1/367 mosaic belong to a proband with missing Age.

1017

1018 **Fig. S12. Mosaic rate by parental age at birth.** Mosaic rate by age of father (blue) and mother (red) at  
1019 birth. Rate = # mosaics/# probands in each parental age bin. Note: 9/2530 probands missing age  
1020 information. 1/367 mosaic belong to a proband with missing age.

1021

1022 **Fig. S13. Confirmation rate across VAF bins.** The number of candidates for which we performed MiSeq  
1023 resequencing among **(A)** the union set (n=143 tested) **(B)** all EM-mosaic calls (n=97) and **(C)** all  
1024 MosaicHunter (n=68) calls vs. the number confirmed as mosaic for VAF ranges [0, 0.1), [0.1, 0.2), and  
1025 [0.2, 0.3).

1026

1027 **Fig. S14. Posterior odds comparison for tested vs. untested mosaics.** Among 309 candidates with  
1028 EM-mosaic posterior odds scores available, we compared the distribution of tested (n=97) vs. untested  
1029 (n=212) mosaics. The log<sub>10</sub>-scaled posterior odds distribution for the tested group is shown in blue  
1030 (mean=5.382). The log<sub>10</sub>-scaled mean posterior odds for the untested group is shown in red



1031 (mean=7.050). The selected candidates had lower posterior odds than those not selected for  
1032 confirmation (Mann Whitney  $U$  test  $P=0.002$ ).

1033

1034 **Table S1. Proband Phenotypes.** Cardiac and neurodevelopmental phenotypes for CHD probands. NDD  
1035 diagnosis is unknown for patients <1 year of age.

1036

1037 **Table S2. Cohort Summary.** Number of *de novo* and mosaic variants for probands with isolated CHD,  
1038 extracardiac anomalies (ECA), neurodevelopmental delay (NDD) or unknown phenotypes.

1039

1040 **Table S3. EM-mosaic Mosaic Candidates.** Candidate mosaic variants identified by EM-mosaic and  
1041 MiSeq validation results.

1042

1043 **Table S4. MosaicHunter Mosaic Candidates.** Candidate mosaic variants identified by MosaicHunter  
1044 and MiSeq validation results.

1045

1046 **Table S5. Blood mosaic Candidate Validation by MiSeq.** 143 candidate mosaic sites were assessed  
1047 using targeted PCR and deep sequencing. 85/97 (88%) of selected EM-mosaic sites and 44/68 (67%) of  
1048 selected MosaicHunter sites were confirmed.

1049

1050 **Table S6. Cardiovascular Tissues with Whole Exome Sequencing.** 70 tissues from 66 CHD probands  
1051 were assessed for mosaic variants.

1052

1053 **Table S7. CHD tissue mosaic Candidate Validation by MiSeq.** 24 candidate mosaic sites were  
1054 assessed using targeted PCR and deep sequencing. 85/92 (92%) of selected EM-mosaic sites and 44/64  
1055 (69%) of selected MosaicHunter sites were confirmed .

1056

1057 **Table S8. CHD related genes.** We considered the union of genes highly expressed in the developing  
1058 heart (HHE) and known candidate CHD genes {Jin 2017} as CHD-related genes (n=4558).

1059

1060 **Table S9. All Protein-Altering Mosaics.** Detailed information for 398 mosaic variants predicted to affect  
1061 protein sequence.

1062

1063 **Table S10. Damaging Mosaics in CHD-Relevant Genes.** Detailed information for 25 mosaic variants  
1064 likely to contribute to CHD.

1065

1066

| ID      | Gene           | Variant Class | Pipeline     | CHD Tissue  |        |         |            | Blood WES VAF |         |           |
|---------|----------------|---------------|--------------|-------------|--------|---------|------------|---------------|---------|-----------|
|         |                |               |              | Location    | WES AD | WES VAF | MiSeq VAF  | WES AD        | WES VAF | MiSeq VAF |
| 1-00543 | <i>CTCF</i>    | Bmis          | EM-mosaic    | AO          | 138,36 | 0.21    | 0.32       | 29,8          | 0.22    | 0.19      |
| 1-00984 | <i>ZNF16</i>   | syn           | EM-mosaic    | LV          | 262,1  | 0.00    | 0.01       | 100,7         | 0.07    | 0.07      |
| 1-01282 | <i>GABRA6</i>  | Dmis          | MosaicHunter | RV          | 104,1  | 0.01    | 0.01       | 55,12         | 0.18    | 0.18      |
| 1-01684 | <i>CCNC</i>    | Bmis          | Both         | AoValve, RV | 36,7   | 0.16    | 0.17, 0.19 | 224,40        | 0.15    | 0.14      |
| 1-02672 | <i>TOR1A</i>   | syn           | Both         | AtrSpt      | 159,10 | 0.06    | 0.10       | 29,6          | 0.17    | 0.19      |
| 1-03512 | <i>RFX3</i>    | LoF           | MosaicHunter | RV          | 156,15 | 0.09    | 0.08       | 39,0          | 0.00    | 0.03      |
| 1-04652 | <i>PCDH10</i>  | syn           | Both         | AtrSpt      | 154,19 | 0.11    | 0.14       | 15,1          | 0.06    | 0.10      |
| 1-07004 | <i>ANK2</i>    | Bmis          | MosaicHunter | SubAoMembr  | 226,13 | 0.05    | 0.04       | 30,0          | 0.00    | 0.00      |
| 1-07004 | <i>MYH14</i>   | Bmis          | Both         | SubAoMembr  | 124,22 | 0.15    | 0.27       | 33,0          | 0.00    | 0.00      |
| 1-07004 | <i>NRG3</i>    | Bmis          | EM-mosaic    | SubAoMembr  | 152,30 | 0.16    | 0.24       | 43,0          | 0.00    | 0.00      |
| 1-07004 | <i>NUDT21</i>  | Bmis          | Both         | SubAoMembr  | 137,22 | 0.14    | 0.14       | 74,0          | 0.00    | 0.02      |
| 1-07004 | <i>TET3</i>    | Dmis          | MosaicHunter | SubAoMembr  | 131,1  | 0.01    | 0.03       | 81,16         | 0.16    | 0.27      |
| 1-07299 | <i>RRS1</i>    | syn           | Both         | RV, UNK     | 160,25 | 0.14    | 0.25       | 22,2          | 0.08    | 0.14      |
| 1-09869 | <i>PIK3C2G</i> | LoF           | MosaicHunter | LV          | 126,9  | 0.07    | 0.10       | 31,0          | 0.00    | 0.00      |
| 1-11800 | <i>TMEM45A</i> | Bmis          | MosaicHunter | RV          | 213,0  | 0.00    | 0.00       | 32,7          | 0.18    | 0.06      |

**Table 2. Mosaics detected in individuals with matched cardiovascular tissue and blood**

Characteristics of mosaic variants predicted for individuals with blood and cardiovascular tissue WES data available. Among 15 mosaics, 5 were detected via analysis of blood WES, 8 were detected from cardiovascular tissue WES, and 2 were detected by both approaches. Six of 7 (86%) mosaics detected from analysis of blood were present in both DNA sources with MiSeq VAF $\geq$ 0.01. Two additional variants previously identified as *de novo* germline variants in blood WES were absent from CHD tissue WES. Minimum 1023 MiSeq reads used to determine VAF. Abbreviations: AD, allelic depth (reference, alternate); AO, aorta; AtrSpt, atrial septum; Bmis, benign missense; Dmis, deleterious missense; LOF, Loss of function variant; LV, left ventricle; RV, right ventricle; VAF, variant allele fraction

1067  
 1068  
 1069  
 1070  
 1071  
 1072  
 1073

| ID      | Gene           | Variant Class | Blood VAF | pLI  | Episcore | Heart Exp | Age (y) | Clinical Phenotype                                                                         |                                                                                                      | PCGC denovo LoF/Dmis Variants in Mosaic Gene |
|---------|----------------|---------------|-----------|------|----------|-----------|---------|--------------------------------------------------------------------------------------------|------------------------------------------------------------------------------------------------------|----------------------------------------------|
|         |                |               |           |      |          |           |         | Cardiac Abnormalities                                                                      | Extracardiac Abnormalities                                                                           |                                              |
| 1-00761 | <i>FBN1</i>    | Dmis          | 0.24      | 1.00 | 98       | 93        | 4.3     | Mitral stenosis                                                                            | dysmorphic features, subglottic stenosis, hypoplastic left mainstem bronchus, short stature          | 3                                            |
| 1-07004 | <i>TET3</i>    | Dmis          | 0.16      | 1.00 | 7        | 87        | 10.3    | Subaortic stenosis                                                                         | None                                                                                                 | 0                                            |
| 1-05662 | <i>SETD2</i>   | LoF           | 0.13      | 1.00 | 99       | 85        | 0.8     | Aortic coarctation, mitral valve hypoplasia                                                | None                                                                                                 | 0                                            |
| 1-00344 | <i>UBR5</i>    | splice        | 0.27      | 1.00 | 95       | 90        | 16      | D-transposition of the great arteries, VSD, valvar and subvalvar pulmonary stenosis        | None                                                                                                 | 0                                            |
| 1-03512 | <i>RFX3</i>    | LoF           | 0.09      | 1.00 | 100      | 46        | 0.4     | Tetralogy of Fallot with pulmonary stenosis                                                | None                                                                                                 | 0                                            |
| 1-06216 | <i>ITSN1</i>   | Dmis          | 0.21      | 1.00 | 98       | 86        | 0.3     | ASD                                                                                        | plagiocephaly, rib anomaly, single kidney, dysmorphic facial features                                | 0                                            |
| 1-00363 | <i>QSER1</i>   | Dmis          | 0.06      | 1.00 | 94       | 79        | 3.7     | Tetralogy of Fallot with pulmonary stenosis, VSD                                           | inguinal hernia                                                                                      | 0                                            |
| 1-13185 | <i>PKD1</i>    | Dmis          | 0.10      | 1.00 | 87       | 84        | 0.8     | VSD, partially anomalous pulmonary venous return                                           | hemangioma                                                                                           | 1                                            |
| 1-00192 | <i>GLYR1</i>   | Dmis          | 0.22      | 0.99 | 89       | 93        | 0.4     | ASD, VSD, interrupted aortic arch, hypoplastic tricuspid valve, BAV                        | None                                                                                                 | 0                                            |
| 1-04046 | <i>FZD5</i>    | Dmis          | 0.09      | 0.99 | 89       | 48        | 0.2     | Tetralogy of Fallot with pulmonary stenosis, VSD                                           | None                                                                                                 | 0                                            |
| 1-06649 | <i>NOVA2</i>   | Dmis          | 0.15      | 0.95 | 75       | 56        | 0.6     | Tetralogy of Fallot with pulmonary stenosis                                                | None                                                                                                 | 0                                            |
| 1-05095 | <i>ISL1</i>    | LoF           | 0.07      | 0.90 | 97       | 25        | 2.4     | ASD                                                                                        | None                                                                                                 | 0                                            |
| 1-06677 | <i>KCTD10</i>  | Dmis          | 0.16      | 0.84 | 75       | 91        | 10.1    | Aortic coarctation, pulmonary valve stenosis                                               | dysmorphic facial features, hydrocephalus, pyloric stenosis, single kidney, imperforate/atretic anus | 0                                            |
| 1-05447 | <i>HNRNPAB</i> | Dmis          | 0.09      | 0.76 | 72       | 99        | 7.8     | ASD, BAV, aortic coarctation                                                               | None                                                                                                 | 0                                            |
| 1-00021 | <i>QKI</i>     | LoF           | 0.13      | 0.76 | 94       | 97        | 0.5     | Doublet outlet right ventricle, pulmonary stenosis, VSD                                    | None                                                                                                 | 0                                            |
| 1-11871 | <i>FHOD3</i>   | Dmis          | 0.18      | 0.05 | 91       | 92        | 0.0     | Tetralogy of Fallot with pulmonary atresia                                                 | hypocalcemia, thrombocytopenia, lymphopenia                                                          | 0                                            |
| 1-01458 | <i>HK2</i>     | Dmis          | 0.27      | 0.04 | 89       | 90        | 0.0     | Hypoplastic left heart with aortic and mitral atresia, aortic coarctation                  | None                                                                                                 | 1                                            |
| 1-00669 | <i>PRKD3</i>   | splice        | 0.19      | 0.02 | 77       | 82        | 0       | D-transposition of the great arteries, conal VSD, bilateral conus, interrupted aortic arch | None                                                                                                 | 0                                            |
| 1-00524 | <i>RNF20</i>   | LoF           | 0.10      | 0.00 | 55       | 83        | 23.7    | Left-dominant complete atrioventricular canal                                              | Heterotaxy with situs inversus totalis, asplenia, duodenal atresia                                   | 0                                            |
| 1-01851 | <i>SUCLA2</i>  | LoF           | 0.11      | 0.00 | 72       | 89        | 15.5    | Balanced complete atrioventricular canal, aortic coarctation                               | None                                                                                                 | 0                                            |
| 1-03885 | <i>LZTR1</i>   | Dmis          | 0.20      | 0.00 | 31       | 84        | 14.7    | Abnormal pulmonary vein draining into the right atrium                                     | left sided/midline liver, asplenia, malrotation                                                      | 2                                            |
| 1-05011 | <i>KCTD20</i>  | Dmis          | 0.26      | 0.00 | 76       | 77        | 24.5    | Transposition of the great arteries, Tricuspid and Pulmonary valve atresia                 | left-sided/midline liver                                                                             | 1                                            |
| 1-00018 | <i>FIG4</i>    | Dmis          | 0.19      | 0.00 | 49       | 70        | 11.8    | BAV, mitral atresia, aortic coarctation, VSD, total anomalous pulmonary venous return      | nephritis                                                                                            | 1                                            |
| 1-05661 | <i>SMAD9</i>   | Dmis          | 0.06      | 0.00 | 84       | 39        | 9.3     | Common atrioventricular canal                                                              | None                                                                                                 | 0                                            |
| 1-09869 | <i>PIK3C2G</i> | LoF           | 0.07*     | 0.00 | 73       | 28        | 6.3     | Common atrioventricular canal, aortic stenosis, aortic arch hypoplasia, VSDs               | dysmorphic facial features, low-set ears, campomelic dysplasia                                       | 1                                            |

**Table 3. Damaging Mosaics in CHD-relevant genes**

There were 25 potentially-pathogenic mosaic mutations based on known gene function and patient phenotype. Some of these probands have previously described rare LoF/Dmis variants, though none are likely pathogenic for CHD {Jin 2017}. Additionally, some genes were previously found to have LoF/Dmis variants among other individuals in this CHD cohort. Abbreviations: ASD, atrial septal defect; BAV, bicuspid aortic valve; Dmis, deleterious missense; episcore, haploinsufficiency score (percentile rank) {Han 2018}; Heart Exp, heart expression percentile rank; LoF, loss-of-function; pLI, probability of loss-of-function intolerance {gnomAD}; PCGC, Pediatric Cardiac Genomics Consortium; VAF, variant allele fraction; VSD, ventricular septal defect. \*VAF refers to CHD tissue WES.

## Declarations

### *Ethics approval and consent to participate*

CHD subjects were recruited to the Congenital Heart Disease Network Study of the Pediatric Cardiac Genomics Consortium (CHD GENES: ClinicalTrials.gov identifier [NCT01196182](https://clinicaltrials.gov/ct2/show/study/NCT01196182)). The institutional review boards of Boston's Children's Hospital, Brigham and Women's Hospital, Great Ormond Street Hospital, Children's Hospital of Los Angeles, Children's Hospital of Philadelphia, Columbia University Medical Center, Icahn School of Medicine at Mount Sinai, Rochester School of Medicine and Dentistry, Steven and Alexandra Cohen Children's Medical Center of New York, and Yale School of Medicine approved the protocols. All subjects or their parents provided informed consent.

### *Consent for publication*

See above.

### *Availability of data and material*

EM-mosaic and code for analyzing data are available from <https://github.com/ShenLab/mosaicism>. The MosaicHunter software is available from <http://mosaichunter.cbi.pku.edu.cn/>. SAMtools is available from <http://www.htslib.org/>. ANNOVAR is available from <http://annovar.openbioinformatics.org/en/latest/>. Integrative Genomics Viewer (IGV) software is available from <https://software.broadinstitute.org/software/igv/>. Whole-exome sequencing data have been deposited in the database of Genotypes and Phenotypes (dbGaP) under accession numbers [phs000571.v1.p1](https://www.ncbi.nlm.nih.gov/geo/query/acc.cgi?acc=GSE102471), [phs000571.v2.p1](https://www.ncbi.nlm.nih.gov/geo/query/acc.cgi?acc=GSE102471) and [phs000571.v3.p2](https://www.ncbi.nlm.nih.gov/geo/query/acc.cgi?acc=GSE102471). In-house pipelines are available from the corresponding authors on reasonable request.

### *Competing interests*

The authors declare that they have no competing interests.

### *Funding*

This work was supported by the National Heart, Lung, and Blood Institute (NHLBI) grants for the Pediatric Cardiac Genomics Consortium [U01-HL098188, U01-HL131003, UM1-HL098147, U01-HL098153, U01-HL098163, UM1-HL098123, UM1-HL098162, UM1-HL128761, UM1-HL128711].

### *Authors' contributions*

YS, JGS, CES, and WKC conceived and oversaw the study. AH, SUM, JALW, HQ, KBM, JGS, CES, YS, WKC analyzed the data. AH developed the EM-mosaic pipeline and wrote the statistical analysis code. SUM, JALW carried out MosaicHunter analyses of blood and tissue samples. JMG, AT, SD performed MiSeq experimental confirmation. AH, SUM, EG, CES, WKC interpreted the impact of mosaics on participant clinical phenotypes. DB, RWK, JWN, GAP, DS, MT-F, MB, RPL, EG, BDG, CES, JGS, WKC were involved in cohort ascertainment, phenotypic characterization, and recruitment. DM collected cardiovascular tissue samples. AH, SUM, JALW, YS, JGS, CES, WKC wrote the manuscript. All authors read and approved the manuscript.

### *Acknowledgements*

The authors would like to thank all the participants and their families.

**Fig 1**

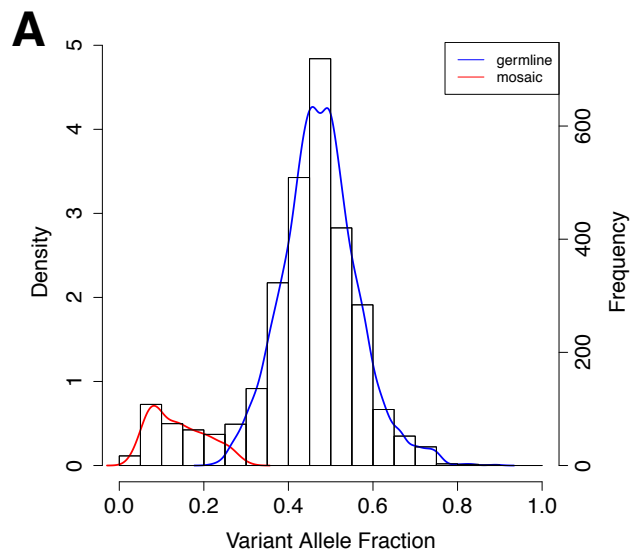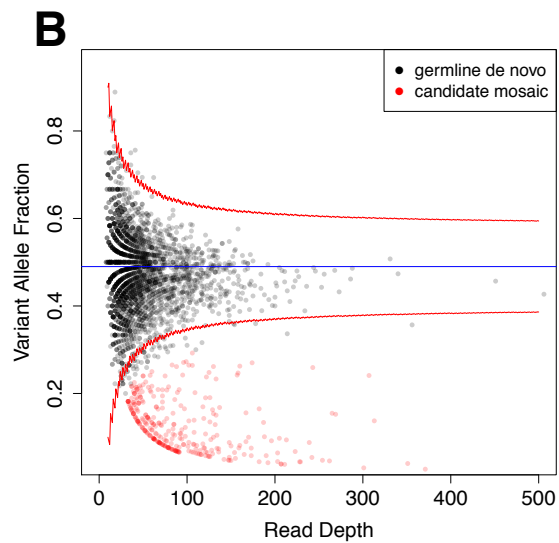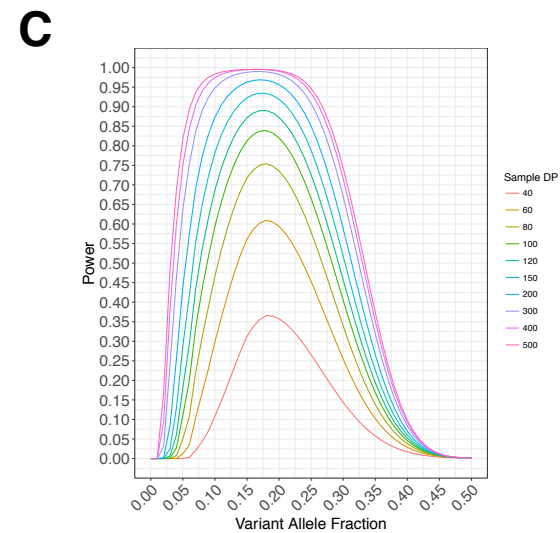



**Fig 2**

**A**

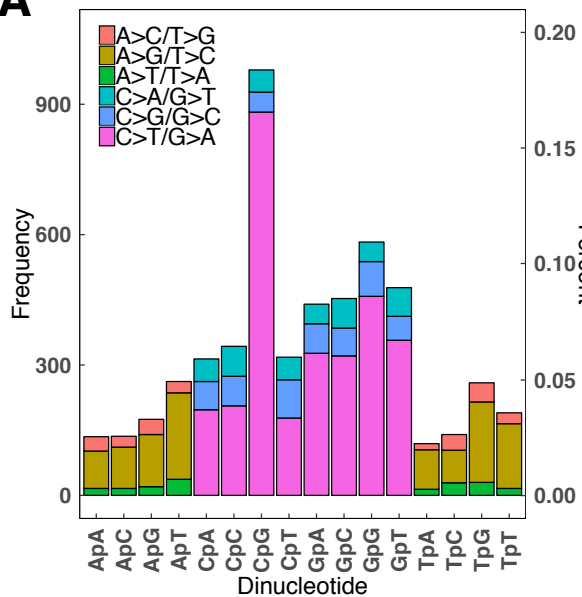

**B**

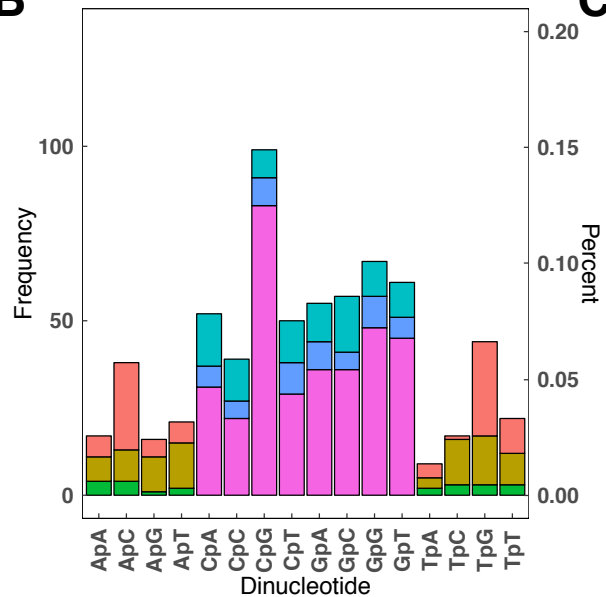

**C**

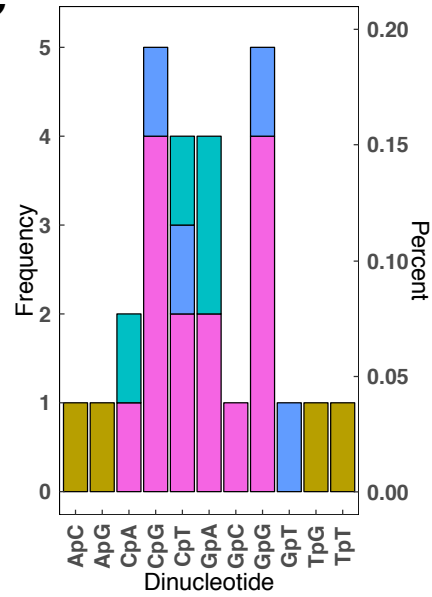

Fig 3

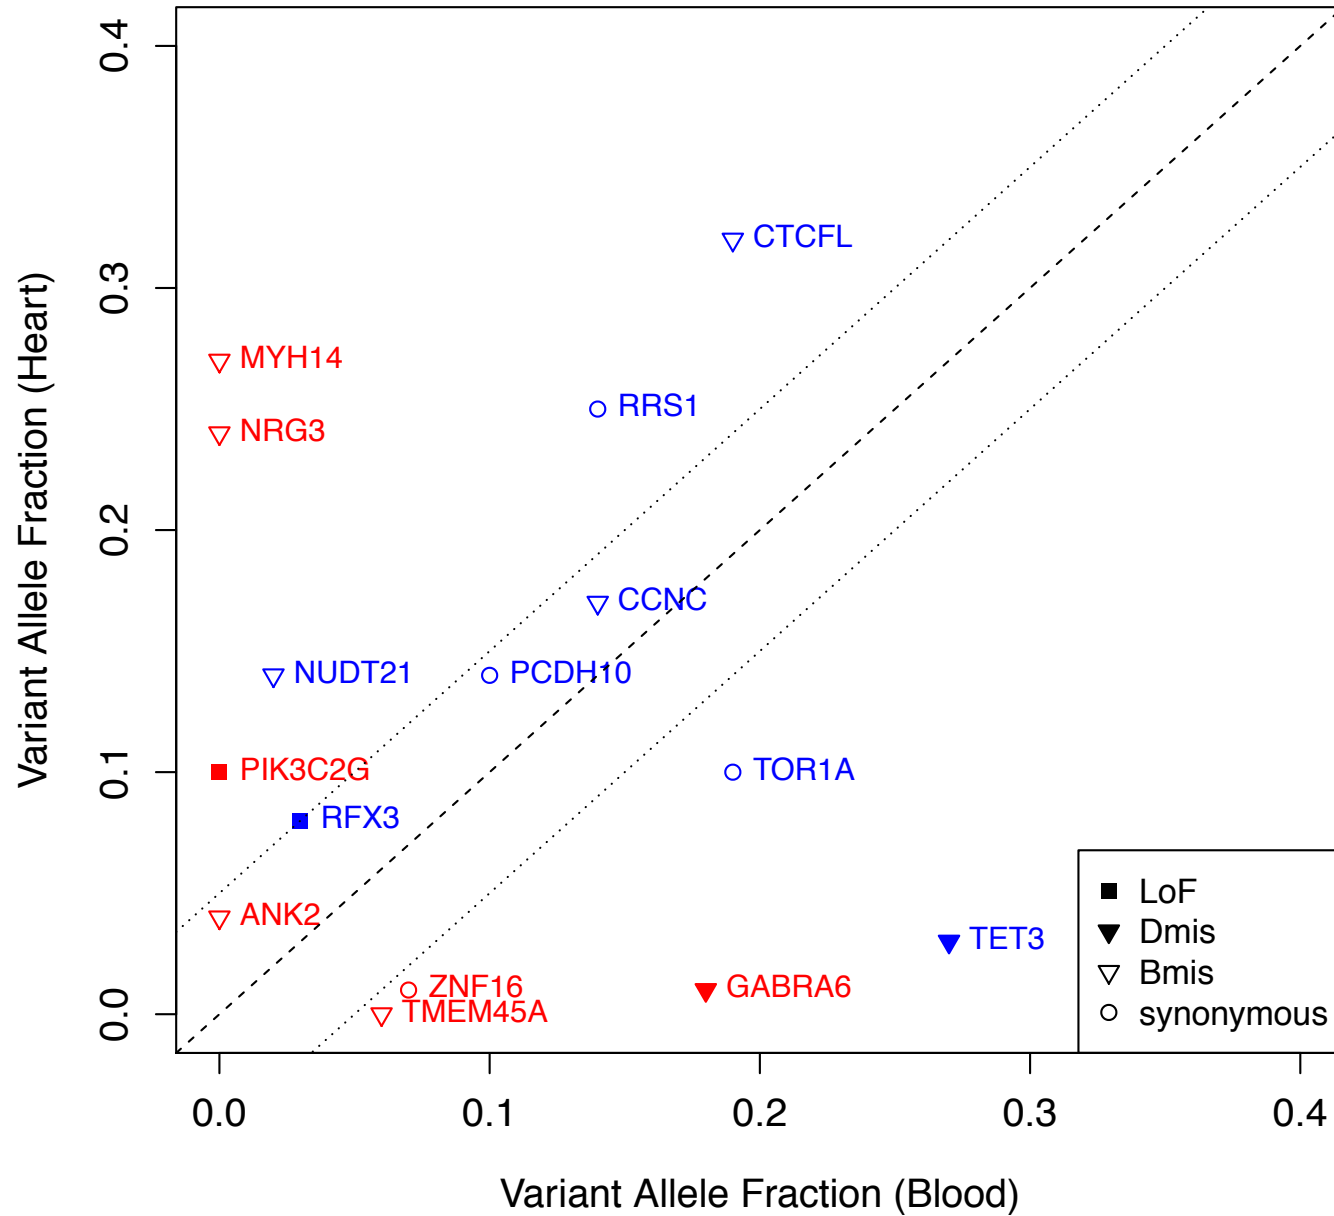

**Fig 4**

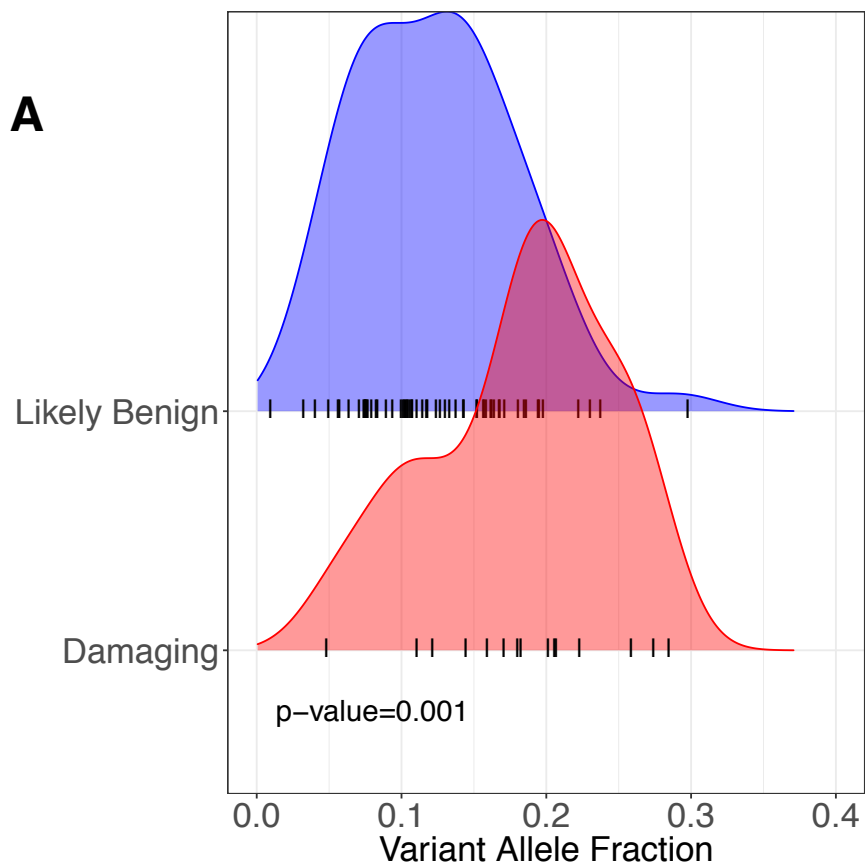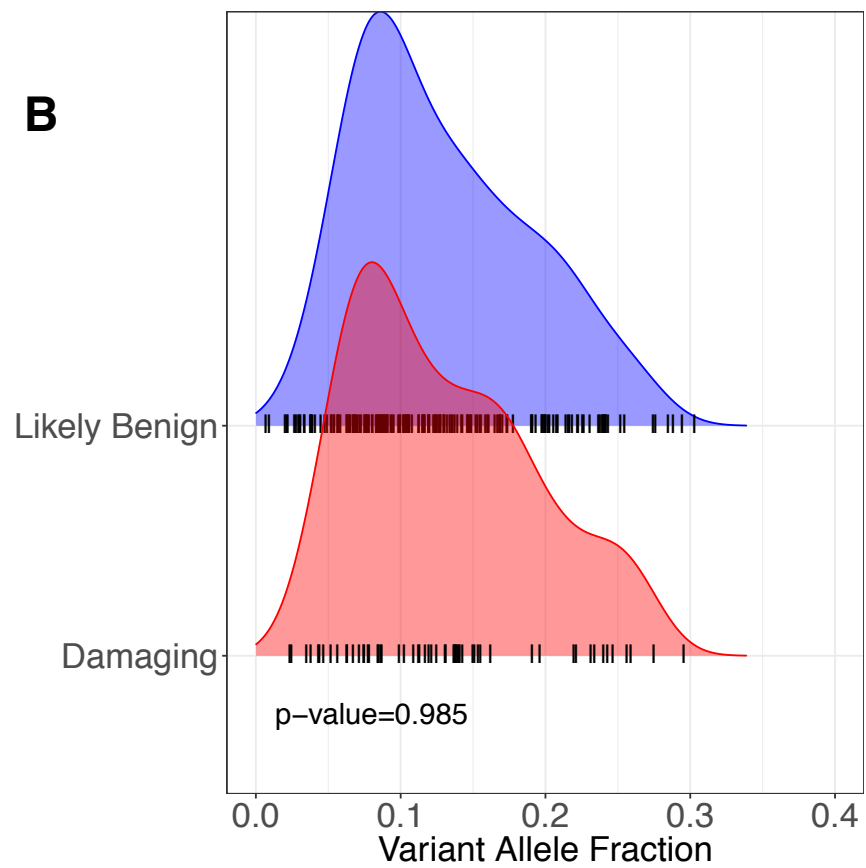

**Fig S1**

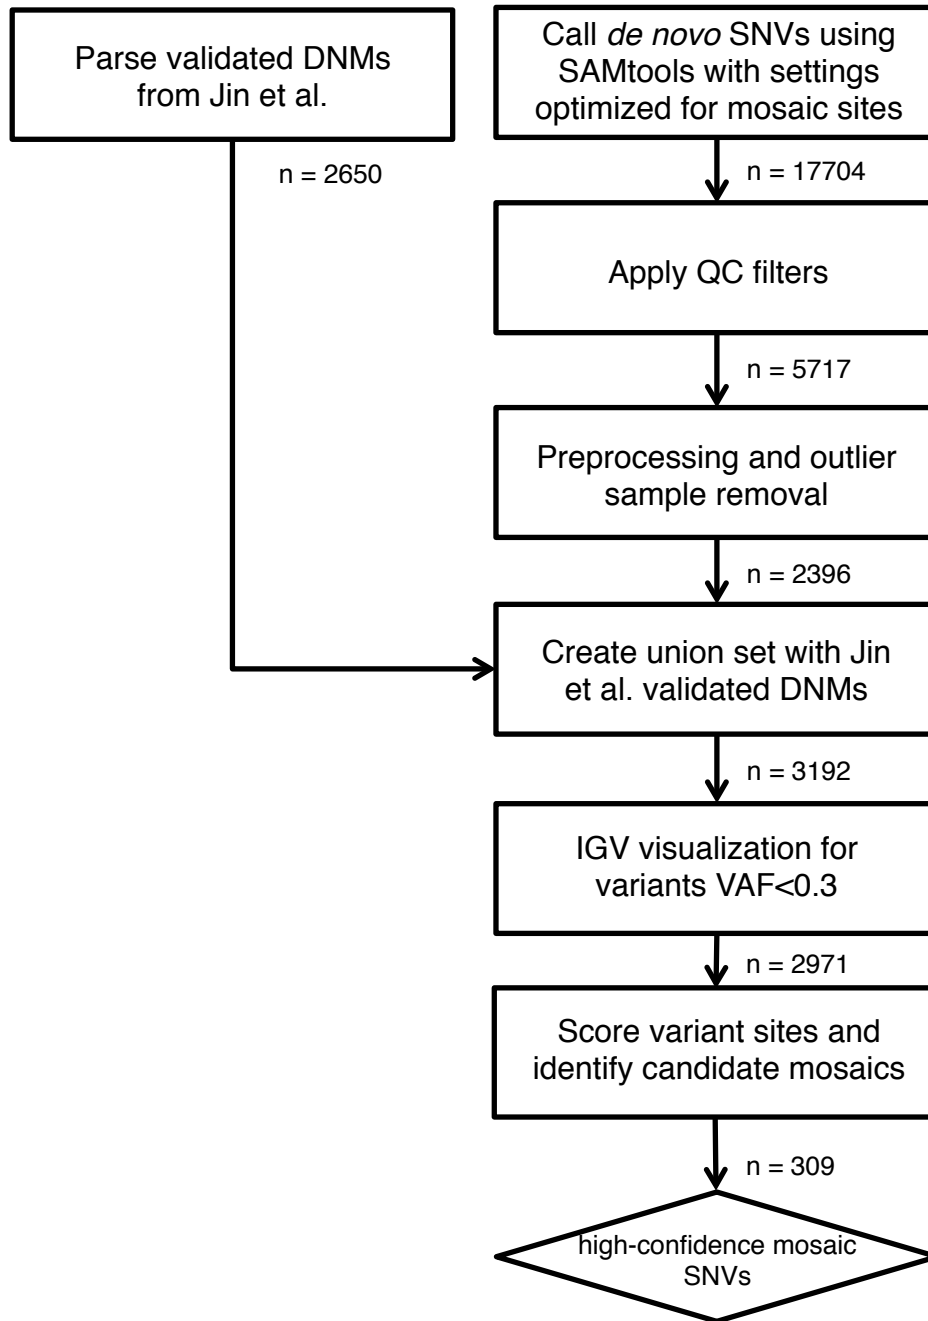

- 28 MH variants not called
- 11 MH variants removed due to parent alt reads >0
- 5 MH variants removed for other quality filters

**Fig S2**

**A**

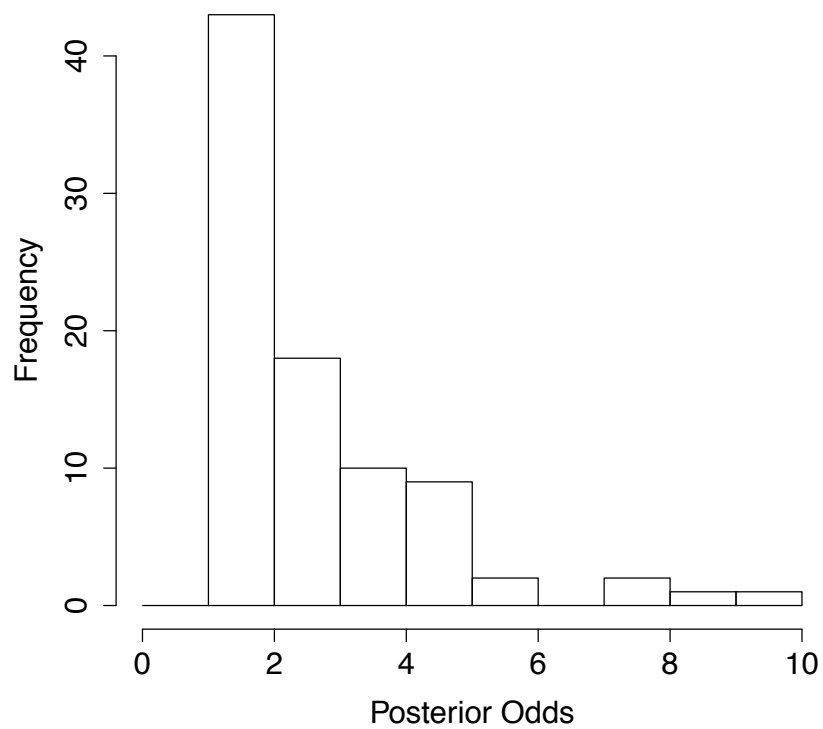

**B**

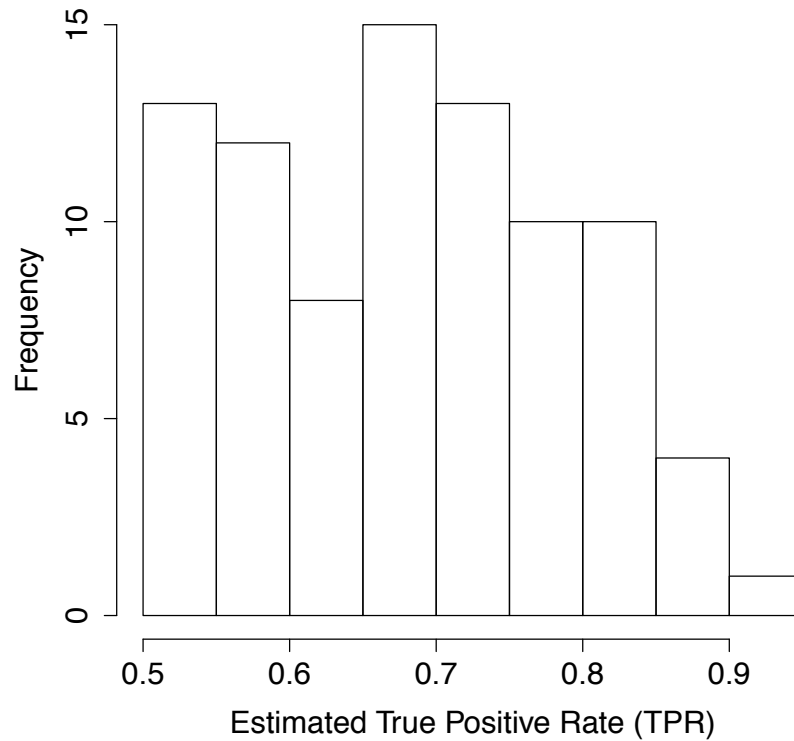

**Fig S3**

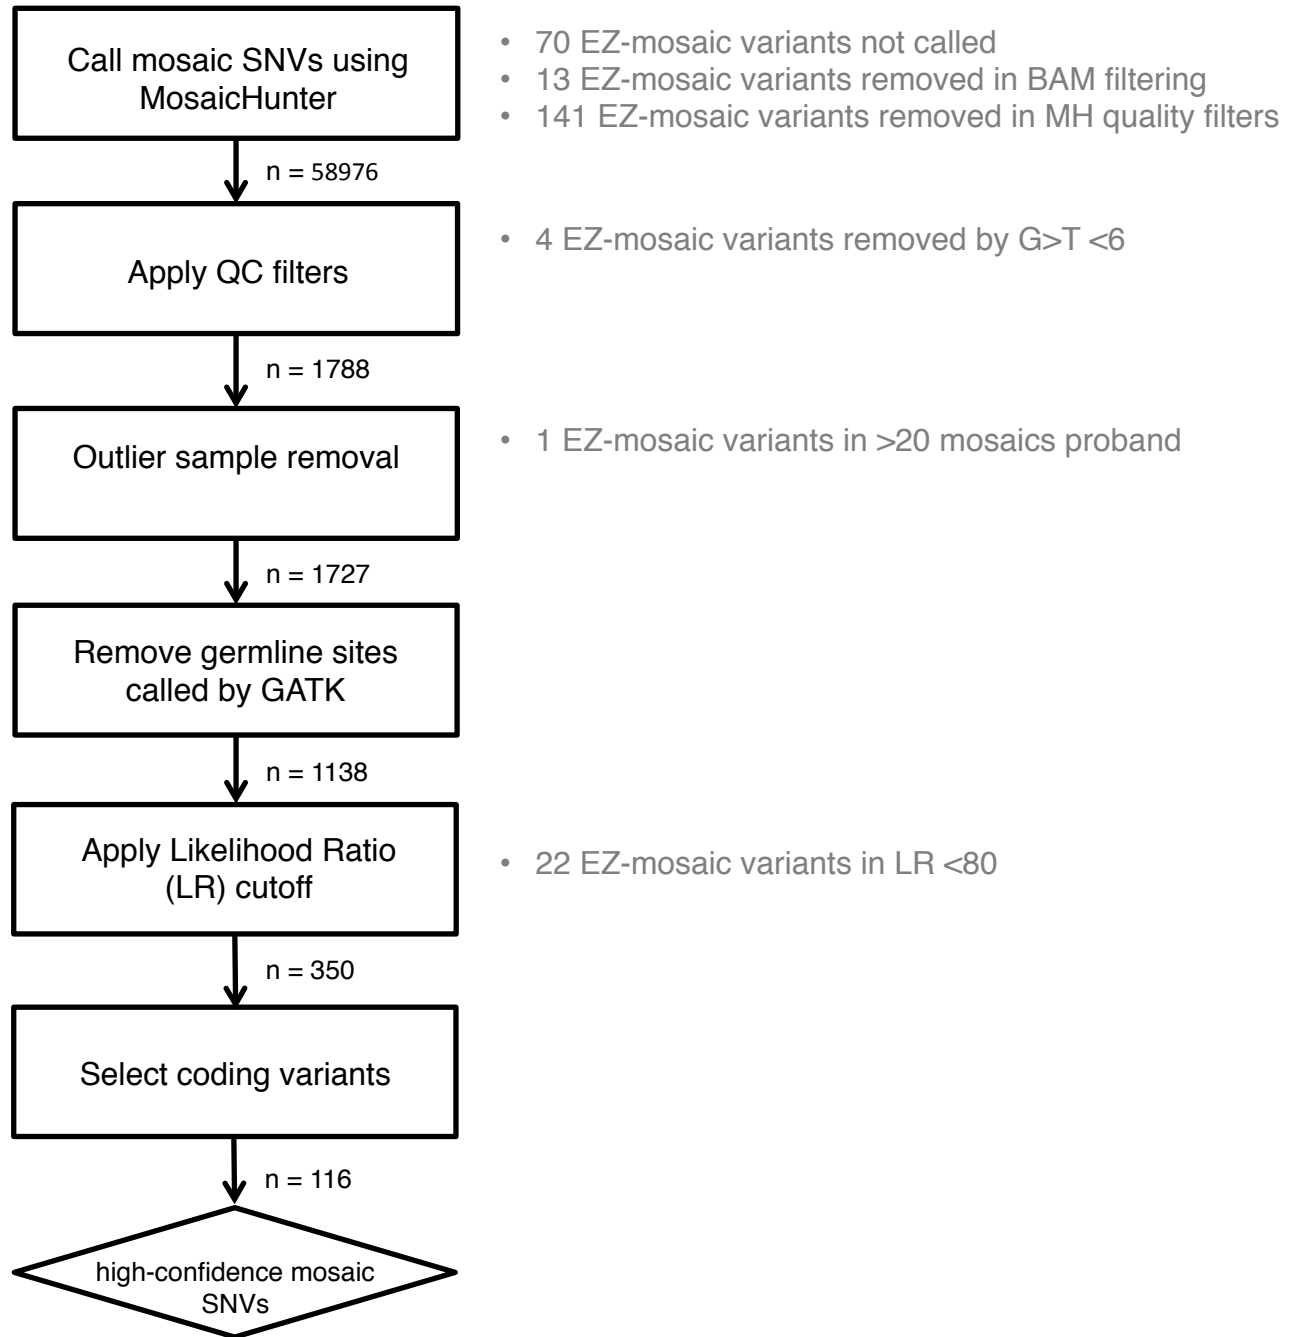

Fig S4

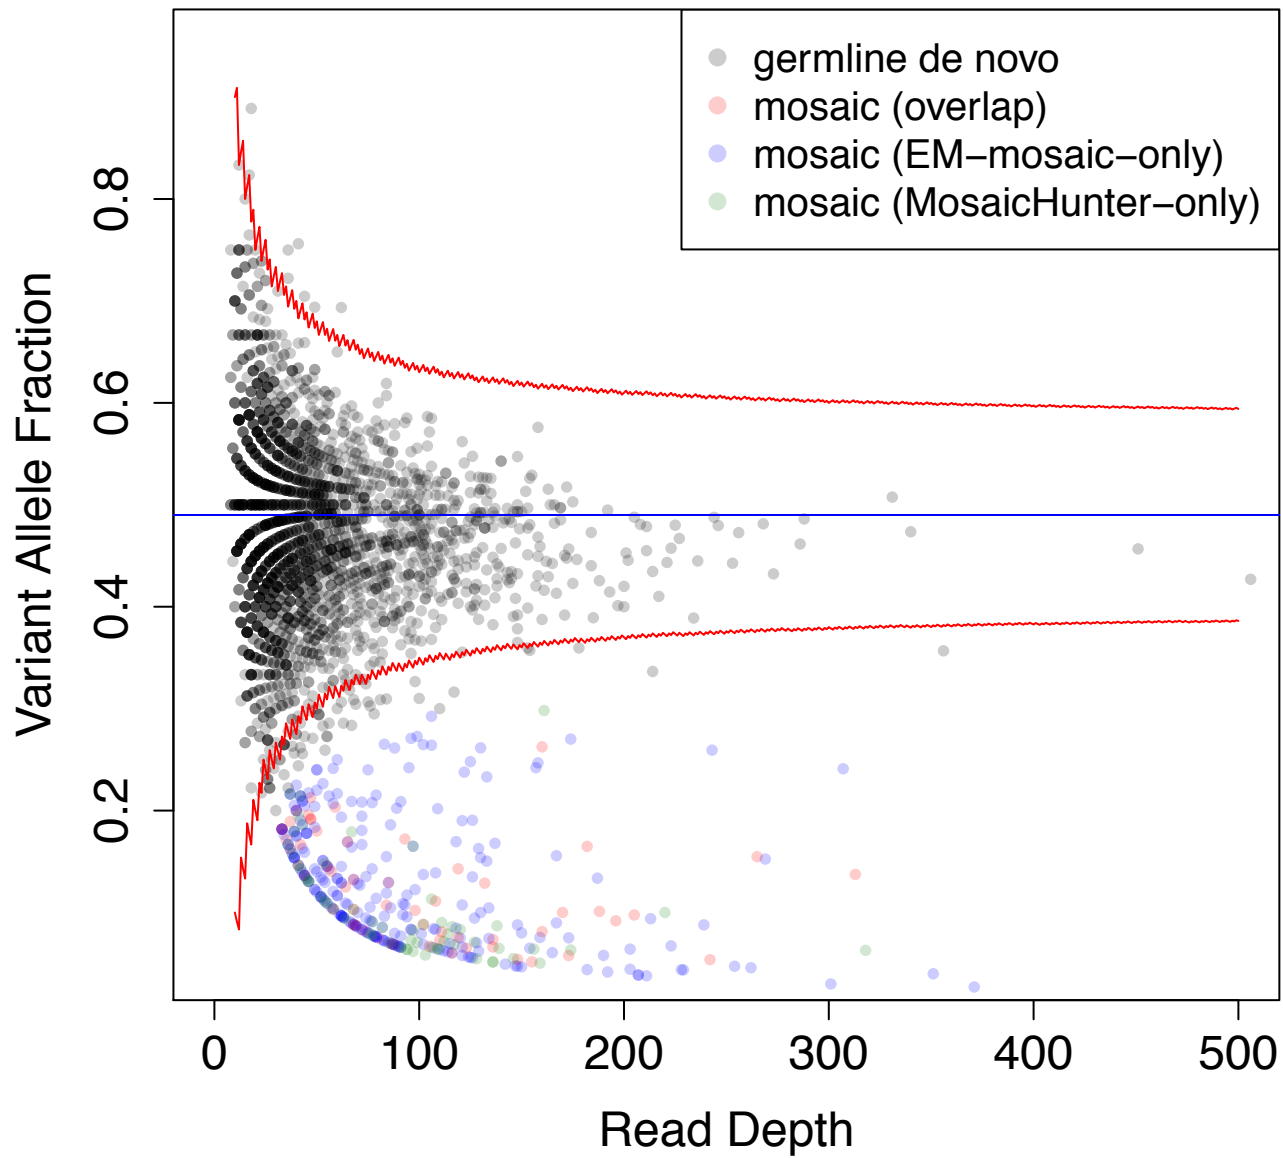



Fig S5

**A**

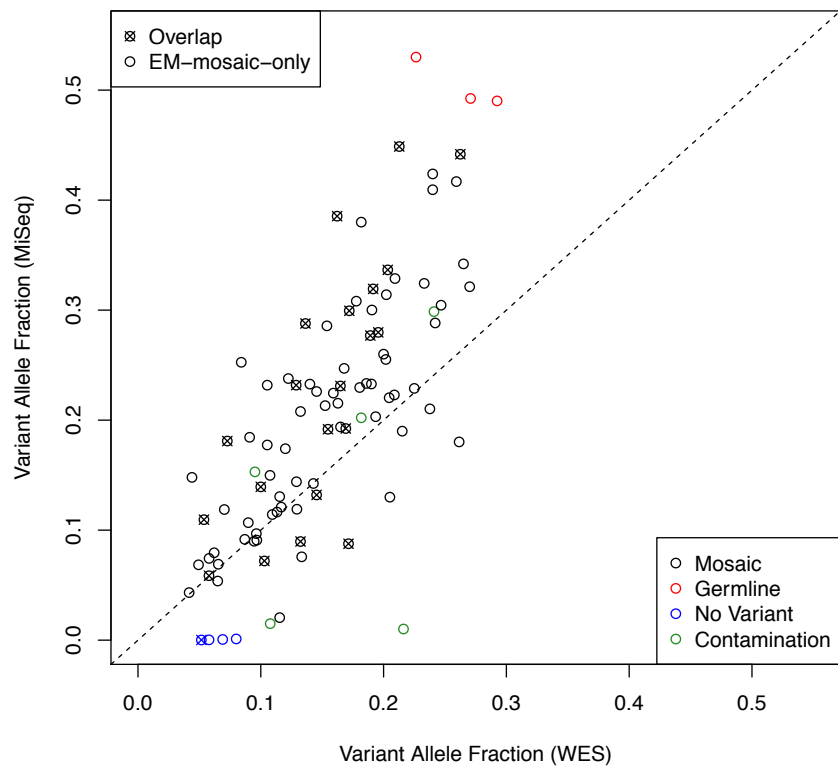

**B**

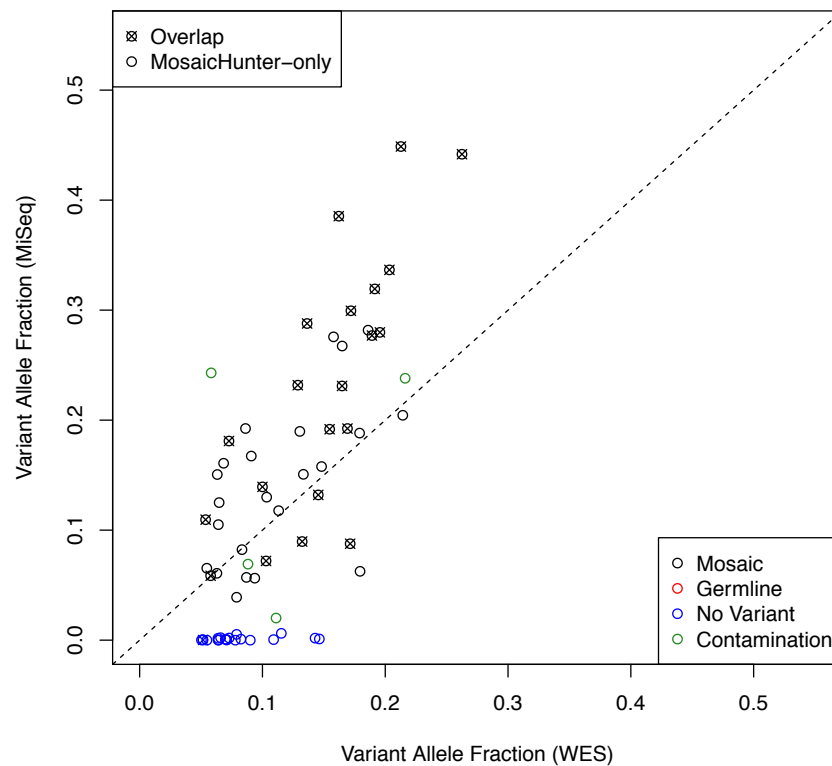

Fig S6

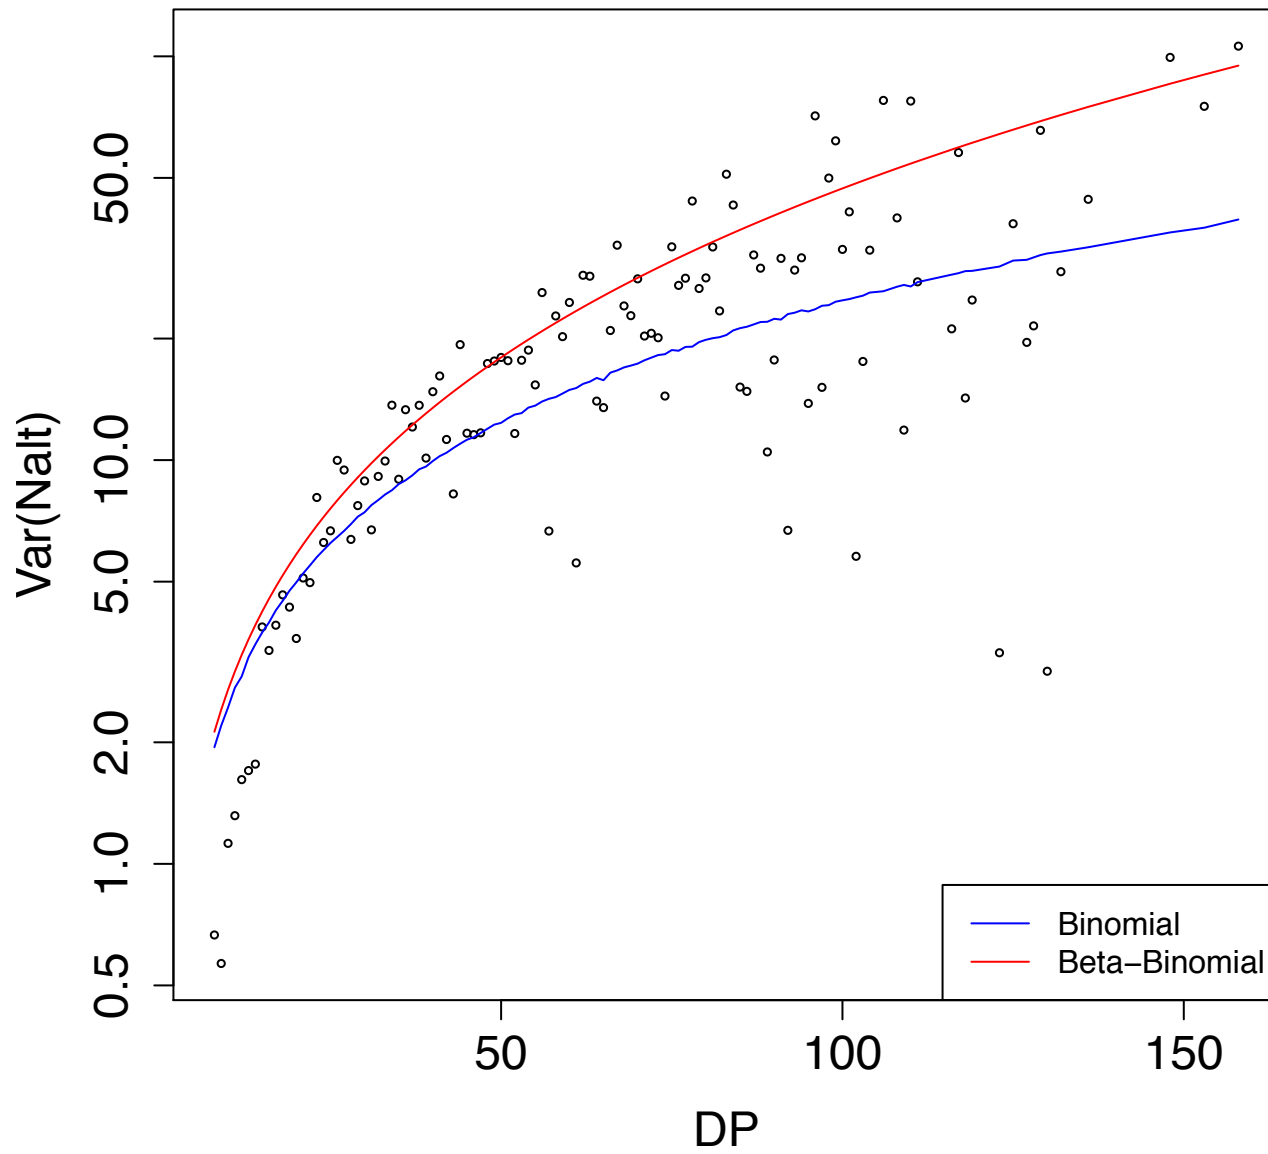

Fig S7

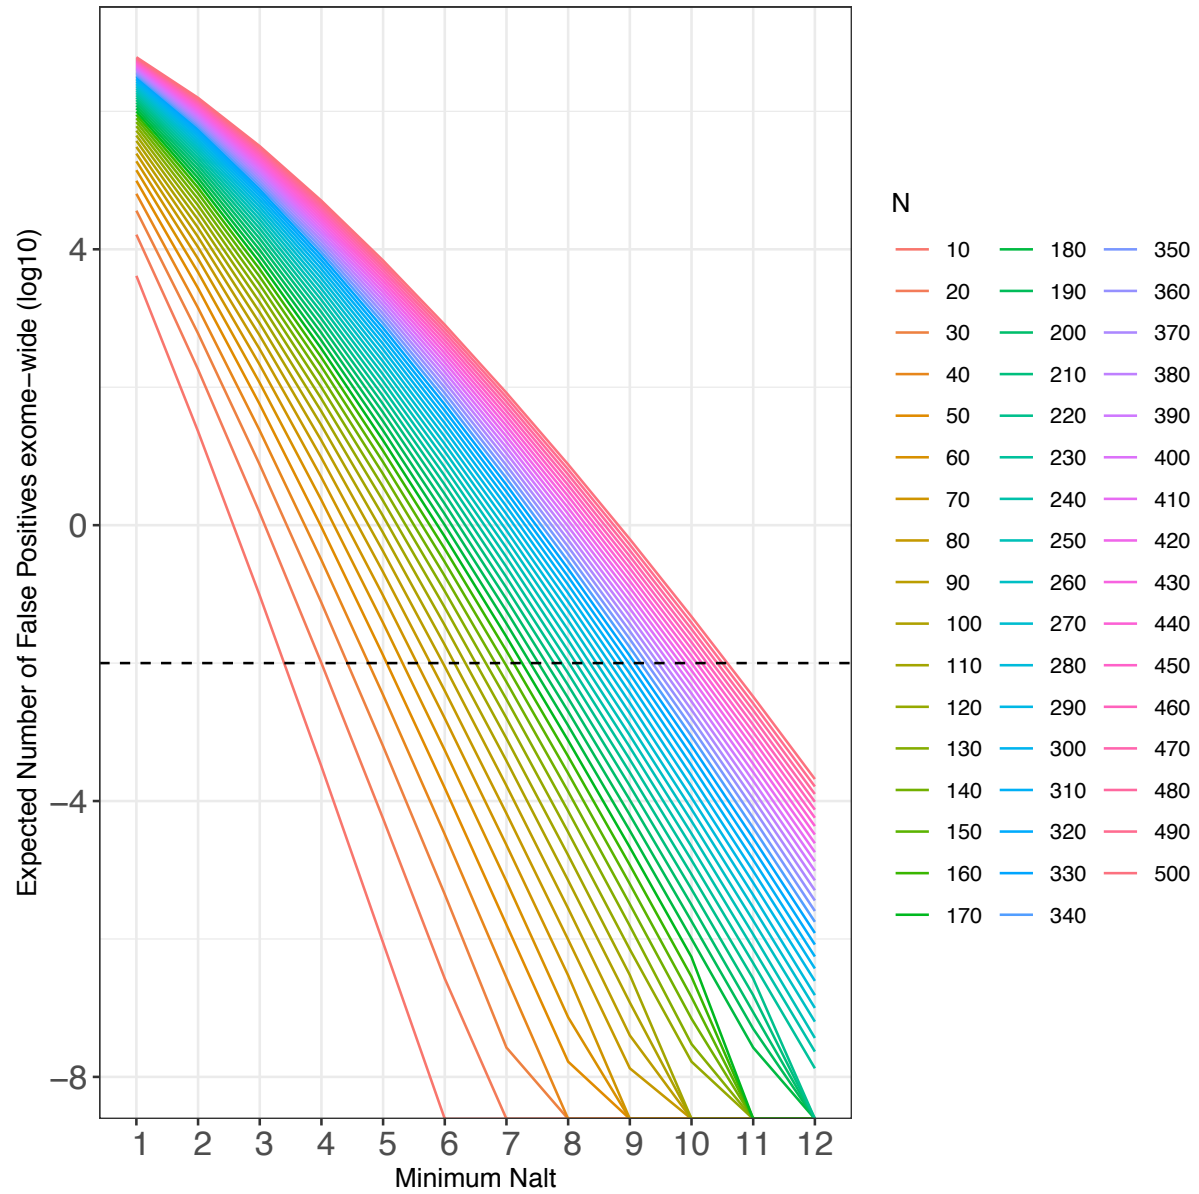

Fig S8

A

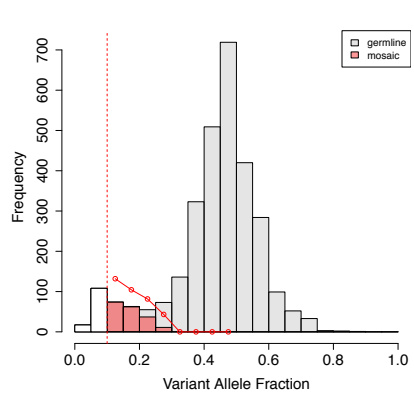

B

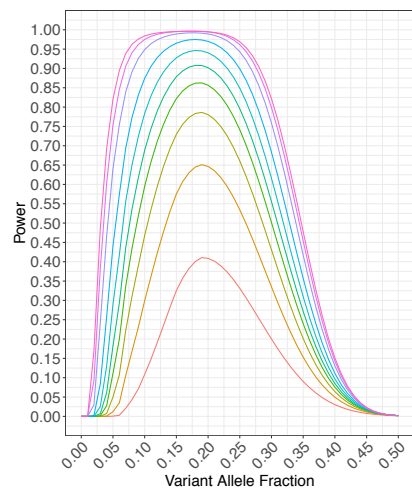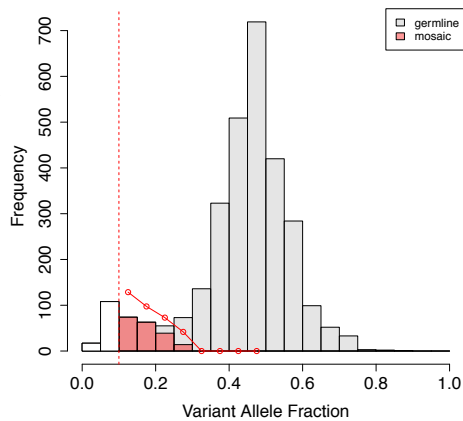

C

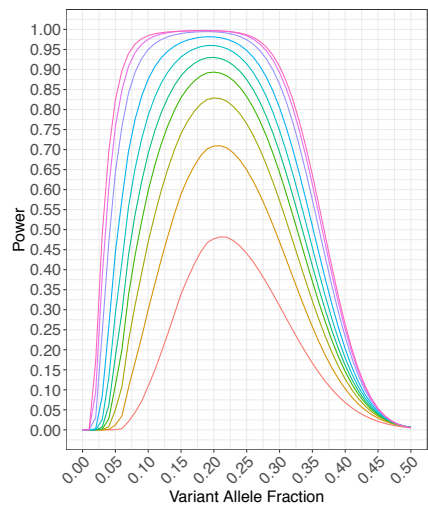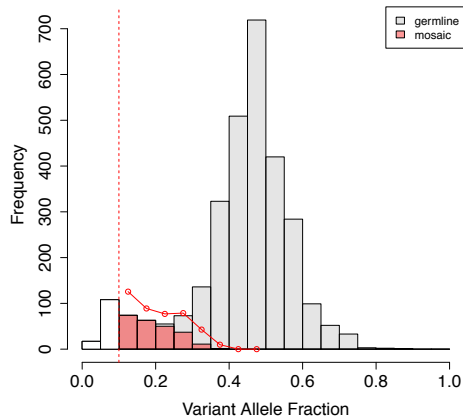

**Fig S9**

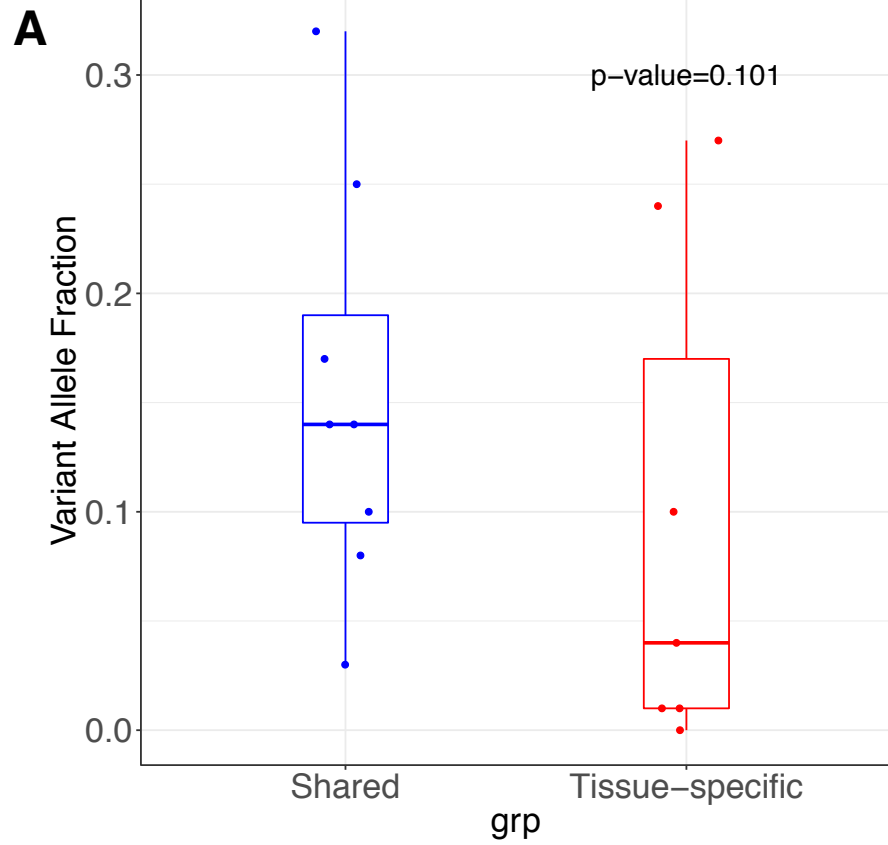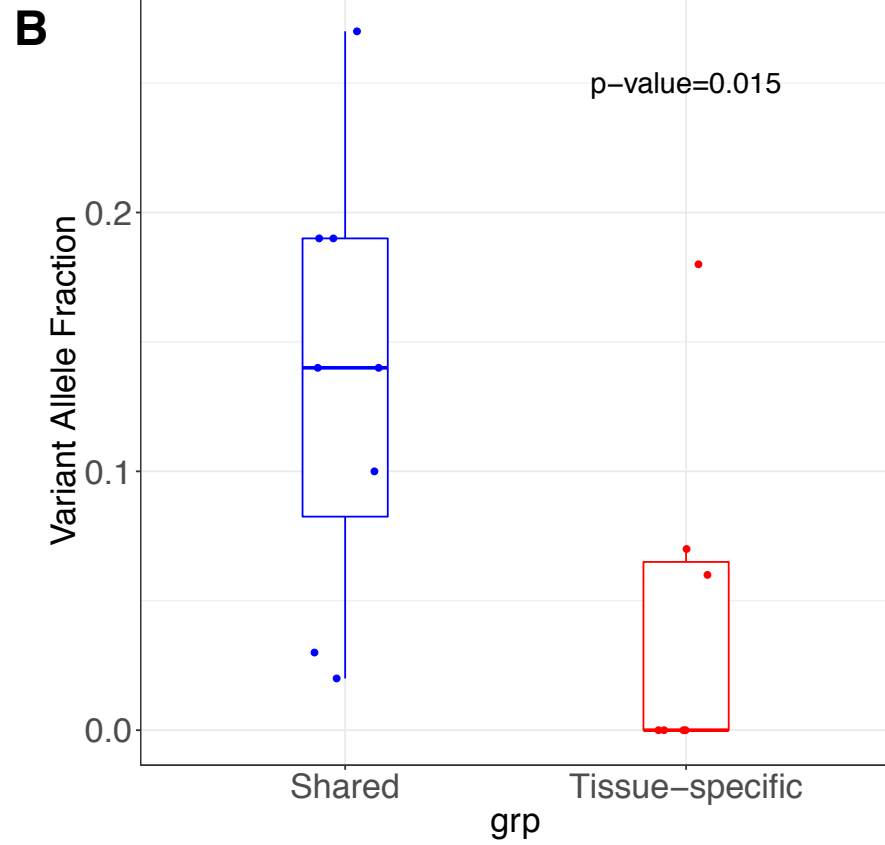

**Fig S10**

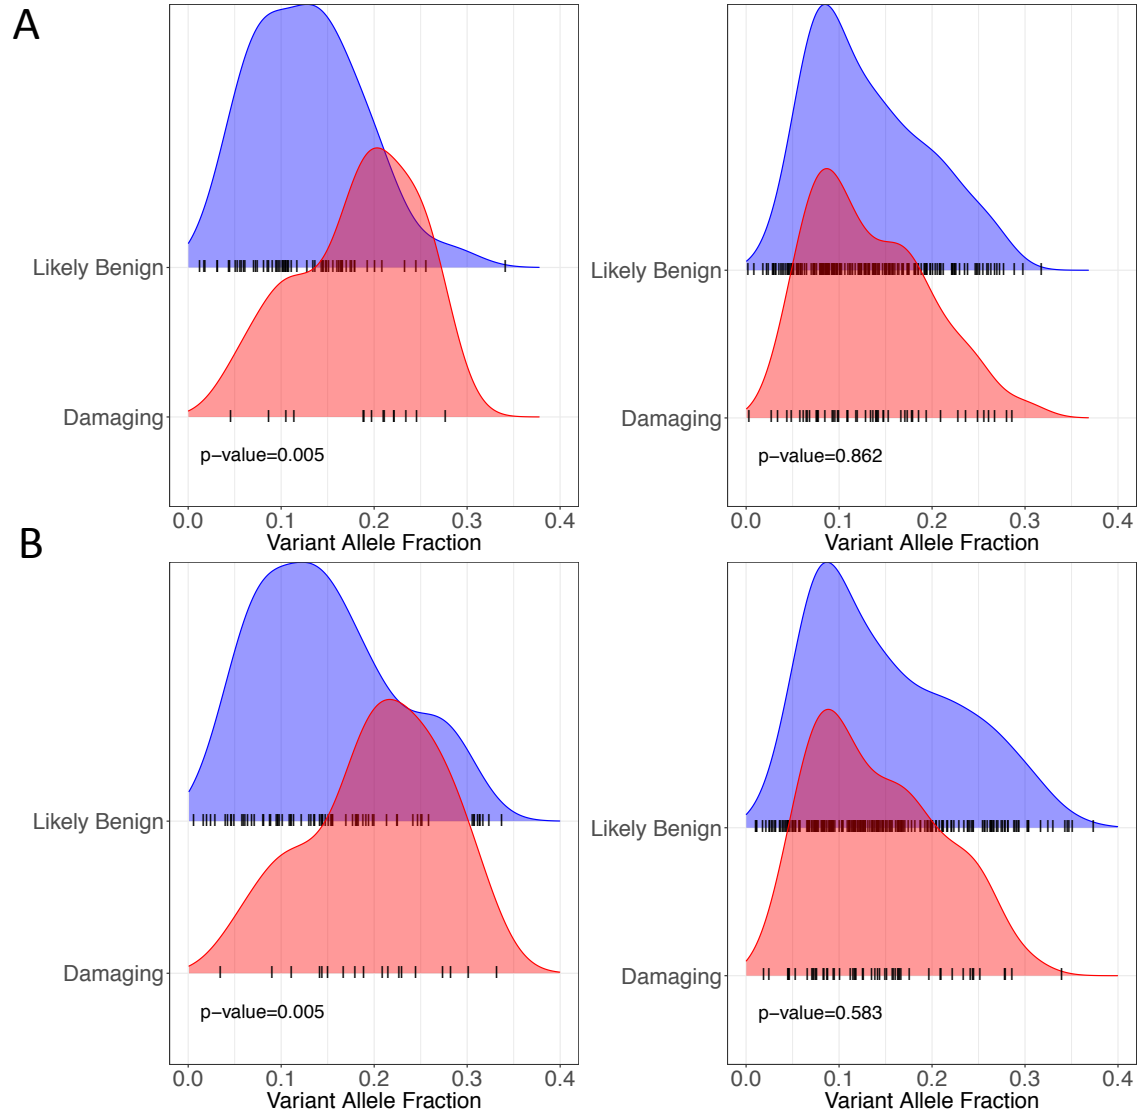

**Fig S11**

**A**

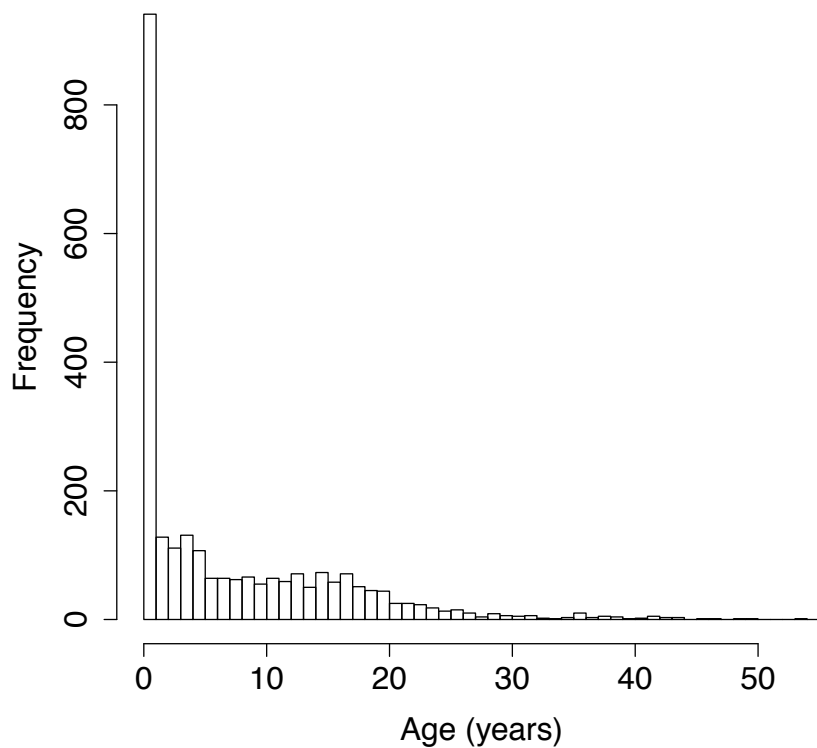

**B**

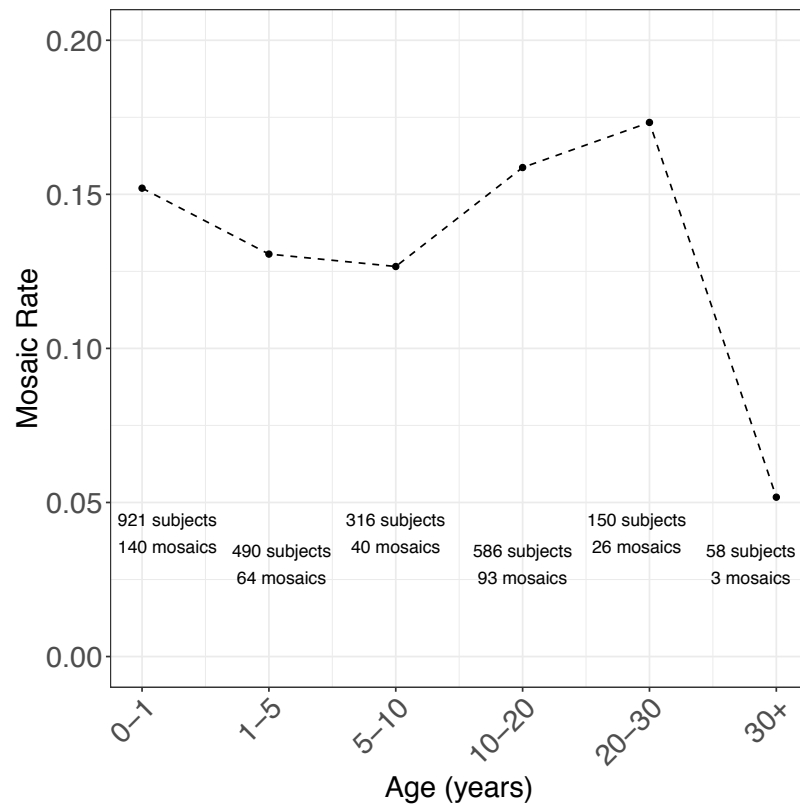



**Fig S12**

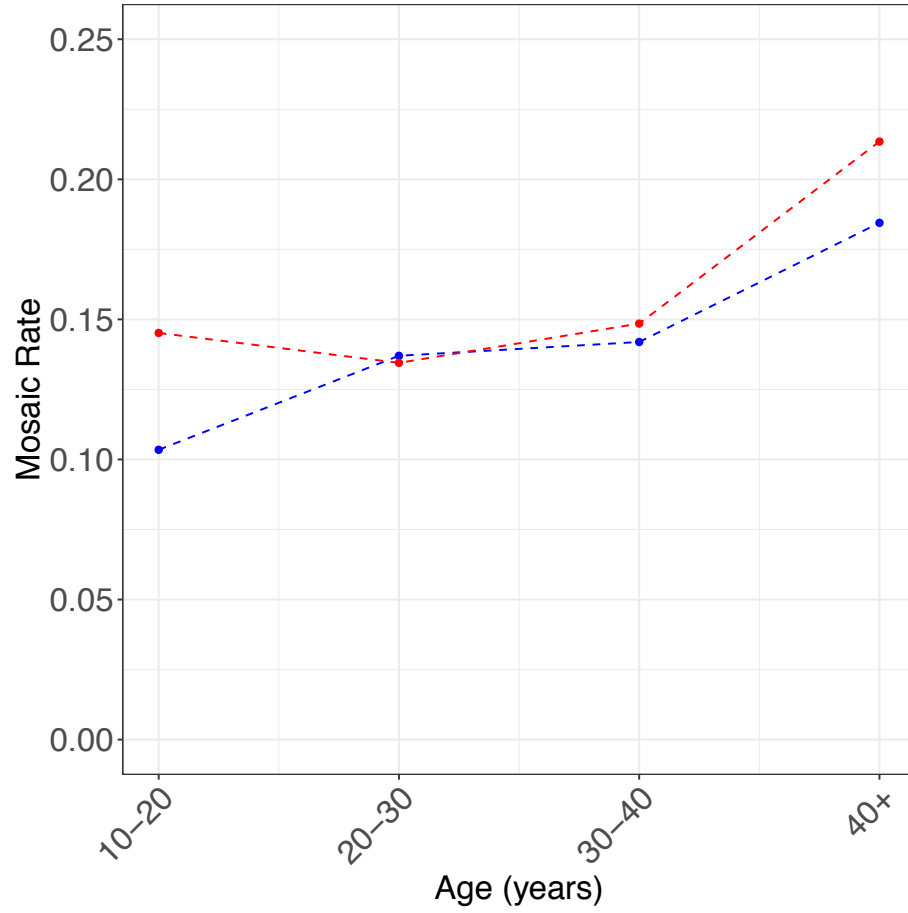

Fig S13

**A**

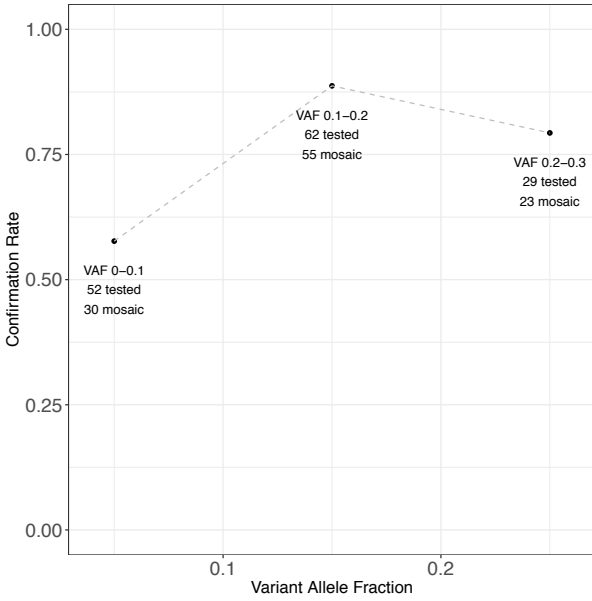

**B**

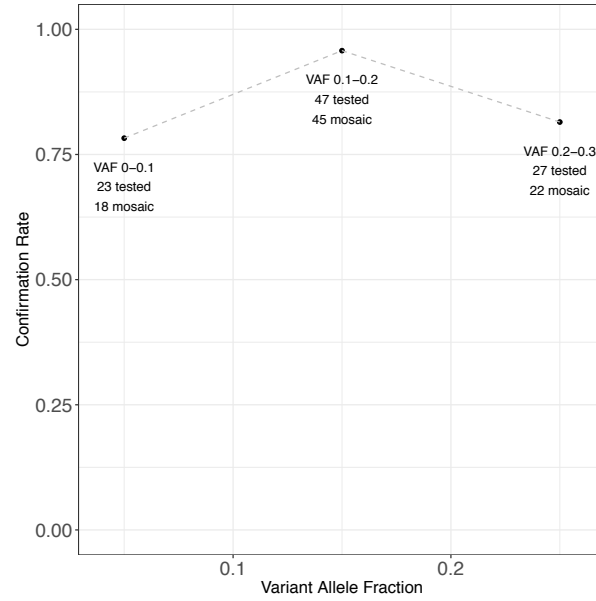

**C**

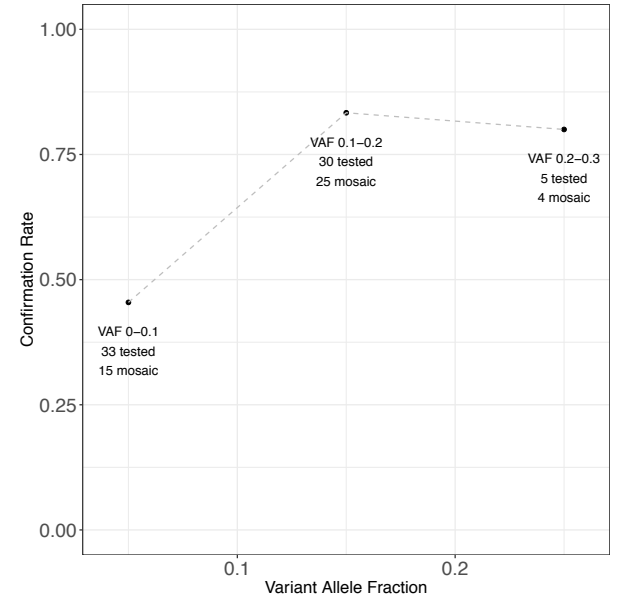

Fig S14

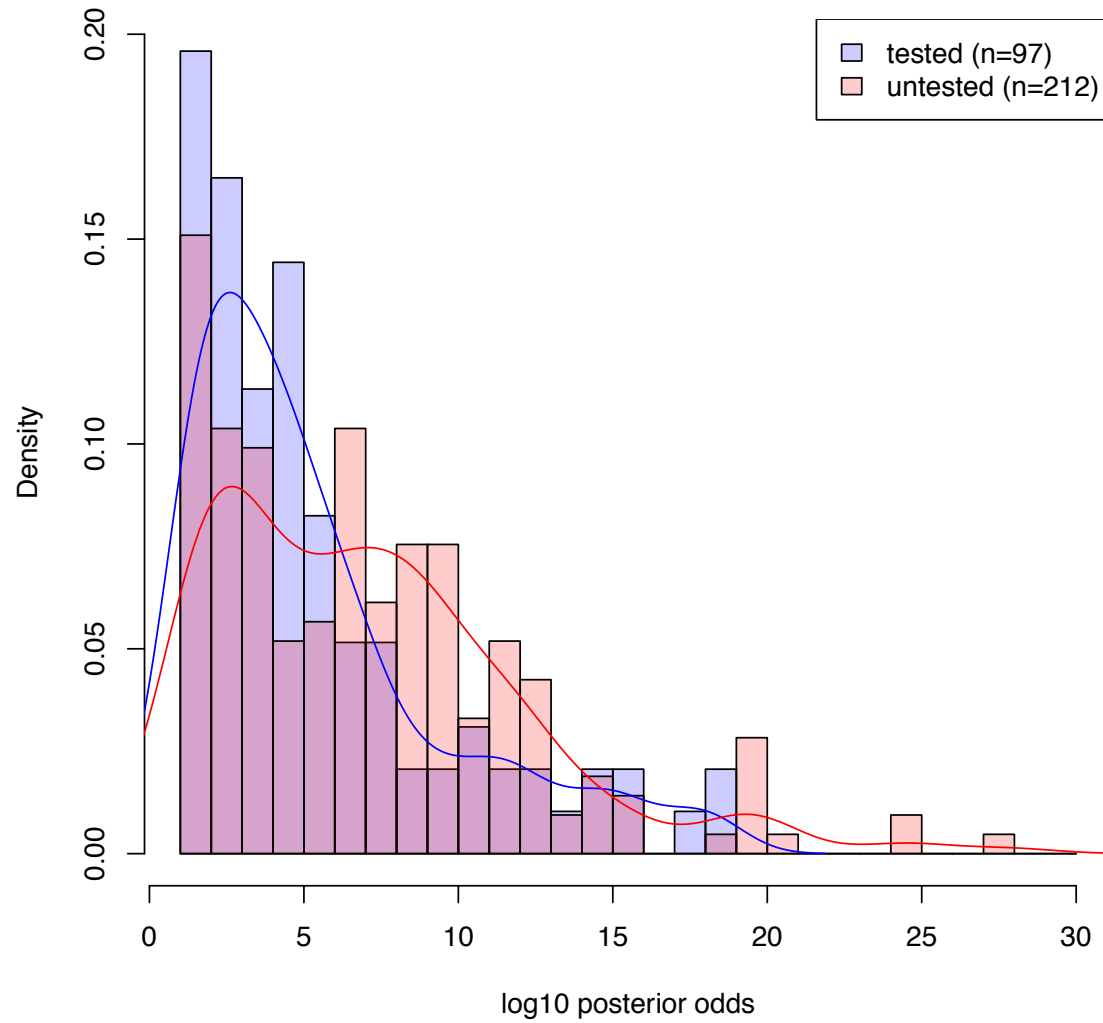

Source: https://www.biorxiv.org/content/10.1101/733105v1.full.pdf
